# 1 **Timing and causes of the evolution of the germline mutation spectrum** 2 **in humans**

3 **Ziyue Gao<sup>1+</sup>, Yulin Zhang<sup>2</sup>, Molly Przeworski<sup>3,4</sup>, Priya Moorjani<sup>2,5+</sup>**

4 <sup>1</sup>Department of Genetics, University of Pennsylvania School of Medicine, Philadelphia, PA

5 <sup>2</sup>Center for Computational Biology, University of California, Berkeley, CA

6 <sup>3</sup>Department of Biological Sciences, Columbia University, New York, NY

7 <sup>4</sup>Department of Systems Biology, Columbia University, New York, NY

8 <sup>5</sup>Department of Molecular and Cell Biology, University of California, Berkeley, CA

9 <sup>+</sup>To whom correspondence should be addressed:

10 Ziyue Gao ([ziyuegao@penncmedicine.upenn.edu](mailto:ziyuegao@penncmedicine.upenn.edu)) and Priya Moorjani ([moorjani@berkeley.edu](mailto:moorjani@berkeley.edu))

11

## 12 **Abstract**

13 Recent studies have suggested that the human germline mutation rate and spectrum  
14 evolve rapidly. When and why these changes occurred remains unclear, however. We  
15 develop a framework to characterize temporal changes in polymorphisms within and  
16 between human populations, while controlling for the effects of selection and biased gene  
17 conversion. Applying this approach to high-coverage, whole genome sequences from the  
18 1000 Genomes Project, we detect significant changes in the mutation spectrum of alleles  
19 of different ages, notably two independent changes that arose after the split of the  
20 ancestors of African and non-African populations. We also find that the mutation spectrum  
21 differs significantly between populations sampled in and outside of Africa at old  
22 polymorphisms that predate the out-of-Africa migration; this seemingly contradictory  
23 observation is likely due to mutation rate differences in remote ancestors that contributed  
24 to varying degrees to the ancestry of contemporary human populations. Importantly, by  
25 relating the mutation spectrum of polymorphisms to the parental age effects on *de novo*  
26 mutations, we show that plausible changes in the age of reproduction over time cannot  
27 explain the joint patterns observed for different mutation types. Thus, other factors—  
28 genetic modifiers or environmental exposures—must have had a non-negligible impact  
29 on the human mutation landscape.

30

## 31 Introduction

32 Recent advances in high throughput sequencing have enabled large-scale surveys of genetic  
33 variation in thousands of humans, providing a rich resource for understanding the source and  
34 mechanisms shaping the mutation landscape over time. Comparisons of polymorphism patterns  
35 across geographic population samples have uncovered numerous differences in the mutation  
36 rates and spectra (i.e., relative proportions of different types of mutations) (Hwang and Green  
37 2004; Harris 2015; Moorjani, Amorim, et al. 2016; Harris and Pritchard 2017; Mathieson and Reich  
38 2017; Narasimhan et al. 2017; Goldberg and Harris 2022; DeWitt et al. 2021; Speidel et al. 2019).  
39 A notable signal in humans is the enrichment of TCC>TTC variants in polymorphism data from  
40 Europeans relative to Africans and Asians (Harris and Pritchard 2017). Many other subtle but  
41 statistically significant signals have also been detected; given the recent common ancestry of  
42 human populations, this finding indicates that the mutational spectrum in humans has been  
43 evolving rapidly.

44  
45 Several genetic and non-genetic factors have been implicated as affecting mutation rates and  
46 acting as potential drivers of observed inter-population differences in the mutation spectrum of  
47 polymorphisms. First, some environmental exposures can increase mutation rates, especially of  
48 particular types. As humans in different geographic locations and environments may have  
49 experienced differential exposures over the past 50,000-100,000 years since the out-of-Africa  
50 (OOA) migration, rates of specific mutation types could have diverged between populations  
51 (Harris 2015; Mathieson and Reich 2017). Second, genetic modifiers of mutation rates such as  
52 variants in genes that copy or repair DNA could segregate at different frequencies across  
53 populations. Despite the deleterious effects of mutator alleles, in recombining species, they could  
54 be nearly neutral and maintained for a long time, leading to genome-wide differences across  
55 populations (Seoighe and Scally 2017; Milligan, Amster, and Sella 2021).

56  
57 In addition, direct sequencing of human pedigrees has revealed the effects of the parental ages  
58 at reproduction on the relative fractions of mutation types (Goldmann et al. 2018; Jónsson et al.  
59 2017). For example, as parents age, fathers pass on disproportionately more T>C mutations, and  
60 mothers contribute a higher fraction of C>G mutations (Jónsson et al. 2017). Thus, differences in  
61 the average reproductive ages, or equivalently “generation times”, across populations alone can  
62 lead to differences in mutation spectrum and indeed, these have been suggested to explain a  
63 large fraction of observed variation in types of polymorphisms among population samples (Macià  
64 et al. 2021).

65  
66 The joint distribution of mutation type and frequency of polymorphisms, however, not only  
67 depends on the mutational input, but also on other evolutionary forces such as natural selection,  
68 biased gene conversion, and demography. In particular, natural selection distorts the allele  
69 frequency distribution and fixation probability of non-neutral variants, and the average effect of  
70 natural selection can differ across mutation types (Wakeley 2010). As an example, genic regions  
71 tend to be more GC-rich, so mutations at G:C base pairs may be subject to stronger purifying or  
72 background selection compared to mutations at A:T base pairs (McVicker et al. 2009; Lander et  
73 al. 2001). GC-biased gene conversion (gBGC) is another process that exerts differential effects  
74 across mutation types by effectively acting like positive selection favoring mutations from weak

75 alleles (A or T) to strong alleles (C or G) and negative selection against mutations from strong to  
76 weak alleles (Duret and Galtier 2009). The strengths of selection and gBGC depend on the  
77 effective population size and thus on the demographic history of a population. Moreover, a  
78 challenge in interpreting previous studies, notably to learn about when changes in mutational  
79 processes may have occurred, is the reliance on allele frequencies (Harris and Pritchard 2017;  
80 Mathieson and Reich 2017). While frequencies are informative of the age of alleles (Kimura 1969),  
81 demographic history shapes the relationship between allele frequency and age. Thus, mutations  
82 of the same frequency can have drastically different distributions of ages in distinct populations  
83 (e.g., doubletons in Africans are substantially older than doubletons in Europeans or Asians)  
84 (Mathieson and McVean 2014) .

85  
86 Beyond the biological processes that shape polymorphism data, the characterization of the  
87 spectrum can also be biased by many technical issues. For instance, a recent study showed that  
88 some inter-population differences discovered in low coverage 1000 Genomes data may be driven  
89 by cell line artifacts or errors in PCR amplification (Anderson-Trocmé et al. 2020). Further,  
90 comparisons of mutation patterns across datasets are sensitive to differences in the accessible  
91 genomic regions across studies. Because there is large variation in mutation rates and base pair  
92 composition across genomic regions, differences in the regions sequenced across studies can  
93 have a non-negligible impact on comparisons of mutation spectrum across datasets (Seplyarskiy  
94 et al. 2021; Monroe et al. 2022). In addition, the number of genomes surveyed, in combination  
95 with the specific population demographic history, influences the chance of observing repeated  
96 mutations at the same site, and thus the observed polymorphism patterns (Lek et al. 2016). Given  
97 these challenges, it thus remains unclear if the numerous observed differences across human  
98 populations stem from rapid evolution of the mutation process itself, other evolutionary processes,  
99 or technical factors.

100  
101 We therefore propose a new framework to compare the mutation spectrum within and across  
102 human populations. First, we infer the age of each derived allele observed in a population using  
103 a newly developed approach, Relate, to reconstruct local genealogies and estimate allele ages  
104 (Speidel et al. 2019). This approach allows us to perform more reliable comparisons across  
105 populations as well as to investigate changes in mutation processes at deeper timescales, beyond  
106 the split of contemporary human populations. Next, we minimize confounding effects of selection  
107 by removing constrained regions and known targets of selection in the genome. Finally, we control  
108 the effects of biased gene conversion by focusing on comparison of pairs of mutations (e.g., T>C  
109 and T>G) that are subject to similar effects of gBGC. This pairwise comparison further mitigates  
110 the issue of interdependencies in comparing mutation fractions (i.e., an increased fraction of one  
111 mutation type necessarily lowers the fractions of other mutation types). Based on this new  
112 framework, we re-evaluate the evidence for evolution of the mutation spectrum in human  
113 populations and investigate when, how, and in which populations significant changes have  
114 occurred over evolutionary time. Finally, by relating parental age effects on the mutation spectrum  
115 estimated in contemporary pedigrees to the observed patterns of polymorphisms of varying ages,  
116 we evaluate the role of generation time changes versus other biological factors in shaping the  
117 human mutation landscape.

118

## 119 **Results**

### 120 **Variation in the spectrum of human polymorphisms over time**

121 We analyzed single nucleotide polymorphisms (SNP) identified in high-coverage whole-genome  
122 sequencing data from the 1000 Genomes Project, including 178 individuals of West African  
123 ancestry living in Ibadan, Nigeria (YRI), 179 individuals of Northern European ancestry living in  
124 the United States (CEU), and 103 individuals of East Asian ancestry living in Beijing, China (CHB)  
125 (Byrska-Bishop et al., 2021). To focus on putatively neutral mutations, we removed exons and  
126 phylogenetically conserved regions (see Materials and Methods). To perform reliable comparison  
127 between datasets in downstream analysis and to ensure the results are not driven by local  
128 genomic differences in mutation rate, we focused on regions that were accessible in both  
129 population and pedigree datasets (Materials and Methods; hereafter, referred to as “commonly  
130 accessible regions”).

131  
132 We inferred the age of each derived variant (polarized to the human ancestral allele) in YRI, CEU  
133 and CHB using Relate, a method to reconstruct local genealogies based on phased haplotype  
134 sequences (Speidel et al. 2019). We then divided all SNPs into 15 roughly equal-sized bins based  
135 on the ages of the derived allele inferred by Relate, accounting for uncertainty in the inferred  
136 mutation age by assuming uniform distribution of age between the inferred lower and upper  
137 bounds for each variant (Materials and Methods). We classified each SNP into six disjoint classes  
138 based on the type of base pair substitution: T>A, T>C, T>G, C>A, C>G, and C>T (each including  
139 the corresponding substitution on the reverse complement strand, such that, e.g., T>C includes  
140 both T>C and A>G substitutions). Given the well-characterized hypermutability of methylated  
141 CpG sites (Duncan and Miller 1980; Kong et al. 2012), we further divided C>T SNPs into sub-  
142 types occurring in CpG and non-CpG contexts by considering the flanking base pair on either side  
143 of the variant.

144  
145 We found marked differences in the relative proportions of different mutation types (i.e., the  
146 mutation spectrum) across varying allele age bins within CEU (Figure 1) as well as in YRI and in  
147 CHB (Figure 1—figure supplement 1), as seen earlier in low coverage 1000G data (Speidel et al.  
148 2019). We obtained qualitatively similar results when considering other 1000G populations of TSI,  
149 LWK and JPT (Figure 1—figure supplement 1). This observation echoes previous findings about  
150 the evolution of the mutation spectrum comparing polymorphisms across allele frequencies  
151 (Harris and Pritchard 2017; Mathieson and Reich 2017; Carlson et al. 2018). As noted previously,  
152 however, differences in mutation spectrum across frequencies alone are weak evidence for the  
153 evolution of the mutation process itself, because patterns of standing polymorphisms can be  
154 affected by repeat mutations and other evolutionary forces, including selection and gene  
155 conversion.

156  
157 Notably, the infinite-sites model is a reasonable assumption for small sample sizes (Kimura 1969),  
158 but recurrent mutations become highly likely in large datasets, especially at sites with higher  
159 mutation rates (Lek et al. 2016; Harpak, Bhaskar, and Pritchard 2016). Recurrent, multi-allelic,  
160 and back mutations violate the model assumptions of Relate and are often excluded from its  
161 output. For instance, given the higher mutation rate of transitions at CpG sites, such SNPs are

162 more likely to be subject to recurrent mutations in a large sample and thus may map to multiple  
163 branches in the tree, leading to their exclusion from Relate's output (Speidel et al. 2019). As  
164 expected from these considerations, the fraction of CpG C>T SNPs in young mutations (i.e., those  
165 estimated to have occurred in the past ~50 generations) is lower than proportions in *de novo*  
166 mutations in present-day pedigree studies (Figure 1—figure supplement 2). Differences in  
167 mutation spectrum across age bins in modern humans persist even after excluding CpG C>T  
168 mutations (Figure 1—figure supplement 3), however, indicating that other mutation types are also  
169 changing in relative frequency over time and the observed patterns are not driven solely by  
170 recurrent mutation at CpG sites.

171  
172 Next, we examined the effect of linked selection on different mutation types. While we excluded  
173 direct targets of selection from analysis (i.e., exons and conserved regions), much of the genome  
174 is linked to non-neutral variants and notably subject to background selection (Charlesworth,  
175 Morgan, and Charlesworth 1993; McVicker et al. 2009; Murphy et al., 2021). A common measure  
176 of the effects of background selection is the *B*-statistic or *B*-score that measures the reduction in  
177 nucleotide diversity levels compared to neutral expectation (McVicker et al. 2009). To characterize  
178 the impact of linked selection, we calculated the average genome-wide *B*-score of each mutation  
179 type. We obtained nearly identical average *B*-scores and similar distributions for all mutation types  
180 (Figure 1—figure supplement 4). Further, comparing the mutation spectrum over time in CEU,  
181 YRI and CHB, we obtained qualitatively similar results when restricting to effectively neutral  
182 regions (*B*-score > 800, where the genetic diversity is reduced by <20% compared to the neutral  
183 expectation; Figure 1—figure supplement 5). These analyses suggest that although linked  
184 selection has pervasive effects, its average impact is relatively uniform across the seven mutation  
185 types in commonly accessible regions (Materials and Methods).

186  
187 Gene conversion is another evolutionary process that can have a profound impact on the mutation  
188 spectrum of polymorphisms. GC-biased gene conversion (gBGC) acts like selection for certain  
189 mutation types, by causing the preferential transmission of strong (S) alleles (C or G) over weak  
190 (W) alleles (A or T) in heterozygotes (Duret and Galtier 2009). Accordingly, we observed  
191 enrichments of W>S mutations (T>A and T>G) in common variants and of S>W mutations (C>A  
192 and C>T) in rare variants (Figure 1—figure supplement 6A). Moreover, gBGC violates model  
193 assumptions (both neutrality and infinite-sites mutation model) of Relate and could lead to subtle  
194 biases in estimated allele age (Speidel et al. 2019). Assuming no systematic evolution in the  
195 relative rates of S>W mutations and W>S mutations and unbiased estimation of allele age under  
196 gBGC, we would expect similar fractions of S>W and W>S mutations across age bins; in contrast,  
197 the W>S variants are overall more enriched in older variants compared to S>W variants (Figure  
198 1—figure supplement 6B; (Speidel et al. 2019)). As the strength of biased gBGC depends on the  
199 effective population size and thus may differ across human populations, these results highlight  
200 the need to account for gBGC in order to reliably interpret the source of observed differences  
201 within and between populations (whether using allele frequency bins or allele age estimates).

202

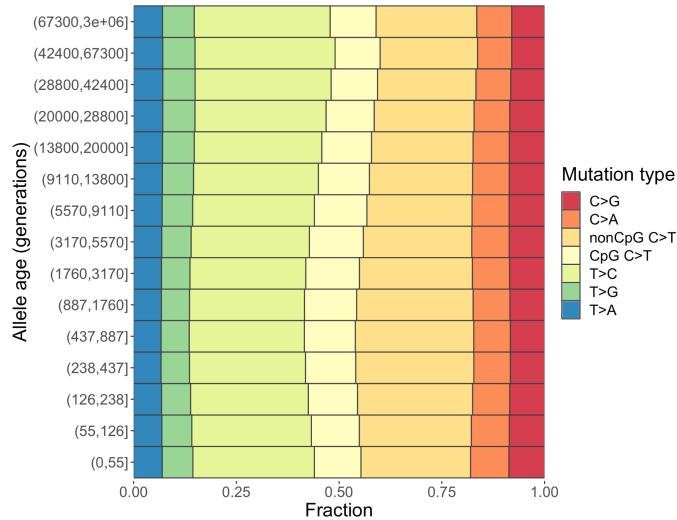

203  
204 **Figure 1.** Changes in the mutation spectrum of polymorphisms in CEU over evolutionary time.  
205

206 The following source data and figure supplements are available for figure 1:

207 **Source data 1.** Relate output for SNPs in commonly accessible region with additional  
208 annotation (one file for each population of YRI, LWK, CEU, TSI, CHB, JPT)

209 **Source data 2.** Text file with (pseudo-)counts of different types of mutations in YRI, LWK, CEU,  
210 TSI, CHB, JPT in each time window.

211 **Figure supplement 1.** Mutation spectra of human polymorphisms stratified by allele age.

212 **Figure supplement 2.** Mutation spectrum of SNPs found in CEU in comparison to that of *de novo*  
213 mutations identified in trios from Iceland.

214 **Figure supplement 3.** Mutation spectra of CEU polymorphisms and DNMs from Icelandic trios,  
215 excluding C>T transitions at CpG sites.

216 **Figure supplement 4.** Mean and distribution of B-scores of different mutation types.

217 **Figure supplement 5.** Mutation spectra of human polymorphisms in genomic regions with weak  
218 background selection (B-score>800).

219 **Figure supplement 6.** Fractions of S>S, S>W, W>S, and W>W mutations in variants stratified  
220 by derived frequency (A) and allele age (B).

221 **Figure supplement 7.** Mutation spectra of human polymorphisms stratified by allele age based  
222 on alternative binning strategies.

## 223 **Pairwise comparisons of mutation types accounting for gBGC**

224 In light of the impact of gBGC on mutation spectrum comparisons, we focused on comparisons  
225 of pairs of mutation types subject to similar effects of gBGC (i.e., both favored, disfavored, or  
226 unaffected by gBGC). Specifically, we focused on four pairwise comparisons including (1) C>T at  
227 nonCpGs vs. C>A at nonCpGs; (2) C>T CpGs vs. C>A CpGs (3) C>G vs. T>A; (4) T>C vs. T>G.  
228 Three of these comparisons involve mutation types with the same mutational opportunity (e.g.,  
229 both T>C and T>G mutations arise from T bases in the genome), which further minimizes the  
230 confounding effects of regional variation on the chance of recurrent mutation or strength of  
231 background selection. Moreover, the pairwise ratios impose no co-dependency among mutation  
232 types as the four comparisons are mathematically independent of each other (although they may

233 be biologically dependent, if multiple ratios are affected simultaneously by some change in the  
234 mutational process).

235  
236 Investigating the mutation spectrum using these four pairwise comparisons, we observed marked  
237 differences in the ratios both over time and across populations. The contrasts across time  
238 windows and among populations point to the timing, direction, and population origin of mutation  
239 rate changes. Specifically, we found three key signals of mutation rate evolution, reflected by both  
240 temporal variation within a population and differences between YRI, CHB and CEU ( $P < 0.01$  by  
241 Chi-square test after correcting for multiple hypothesis testing; Materials and Methods) (Figure  
242 2A). These differences may represent broader geographic or population differences, as they were  
243 replicated in other populations from the same continents— LWK, TSI, and JPT— from 1000  
244 Genomes Project (Figure 2—figure supplement 1).

245  
246 We performed multiple sanity checks to rule out sources unrelated to mutation or technical  
247 artifacts contributing to the inter-population differences. First, the signals are unlikely to be driven  
248 by gBGC and selection, as the pairwise comparisons are designed to control for their effects. In  
249 addition, we obtained qualitatively similar results when restricting the analysis to neutral regions  
250 largely unaffected by linked selection ( $B$ -score  $> 800$ ) (Figure 2—figure supplement 2) or  
251 comparing regions with high and low recombination rates (Figure 2—figure supplement 3). To  
252 account for potential inaccuracies in mutation ages estimated by Relate, we stratified variants by  
253 allele frequencies instead of inferred mutation age; the results were qualitatively similar (Figure  
254 2—figure supplement 4). Lastly, we find qualitatively similar results with different boundaries for  
255 allele age binning (Figure 2—figure supplement 5). Together, these results provide unequivocal  
256 evidence that the human germline mutation spectrum has evolved over time and differs across  
257 populations.

258  
259 We now discuss each of the three signals of mutation rate evolution in detail.

### 260 261 **European-specific elevation of non-CpG C>T/C>A ratio**

262 The largest signal that we observed is the CEU-specific transient elevation in the ratio of C>T/C>A  
263 mutations at nonCpG sites compared to the ancestral state before the OOA migration; in contrast,  
264 the nonCpG C>T/C>A ratios of CHB and YRI remain relatively constant through time. This signal  
265 encompasses the previously reported enrichment of C>T polymorphisms in a TCC context in  
266 Europeans, as well as other tri-nucleotide contexts (Harris and Pritchard 2017; Mathieson and  
267 Reich 2017; Speidel et al. 2019). Investigating the temporal patterns in CEU, we found that the  
268 increase in the ratio of C>T/C>A mutations at nonCpG sites becomes discernible starting from  
269 the time window spanning the OOA migration (50,000-100,000 years ago or ~2,000-4,000  
270 generations ago) (Schiffels and Durbin 2014), peaks around 238–887 generations ago, and  
271 subsides in the most recent age bin of 0–55 generations (Figure 2A). Because there is large  
272 uncertainty in inferred allele ages and our binning approach effectively spreads the contribution  
273 of each variant to two or more bins (Materials and Methods), the timeline and magnitude of  
274 variation should be interpreted cautiously: The transient change in nonCpG C>T mutations was  
275 likely shorter-lived and possibly of higher intensity than our results suggest. However, the  
276 temporal and geographic enrichment patterns from our analysis are consistent with previous

277 reports based on low coverage 1KG or other datasets (Harris and Pritchard 2017; Mathieson and  
278 Reich 2017; Speidel et al. 2019).

279  
280 Among all nonCpG trinucleotide contexts, the inter-population differences are most pronounced  
281 in the four previously reported tri-nucleotide contexts (TCC, TCT, CCC, and ACC; (Harris and  
282 Pritchard 2017)), but it is detectable in other nonCpG contexts as well (Figure 2B). Previous  
283 analysis found that these mutational contexts are enriched in two of the mutational signatures  
284 extracted from somatic mutations in tumor samples: the Catalog of Somatic Mutations in Cancer  
285 (COSMIC) SBS7 and SBS11 associated with exposures to ultraviolet light and alkylating agents,  
286 respectively (Harris 2015; Mathieson and Reich 2017; Alexandrov et al. 2020). To test if one of  
287 these two mutational signatures may be responsible for the observed differences in polymorphism  
288 data, we recalculated the C>T/C>A mutation ratio at nonCpG sites after excluding the sequence  
289 contexts most affected by SBS7 or SBS11 (Materials and Methods). While we observed some  
290 reduction in the magnitude of nonCpG C>T/C>A ratio in Europeans, the inter-population  
291 differences remain significant (Figure 2B). These results suggest the transient change in nonCpG  
292 C>T/C>A ratio is not fully driven by the mutational mechanisms corresponding to either COSMIC  
293 SBS7 or SBS11. Thus, the etiology of this transient increase in Europeans remains unclear.

#### 294 295 **Divergence of C>G/T>A ratio among populations**

296 The second largest inter-population difference was in the C>G/T>A ratio (Figure 2A): following  
297 the OOA migration, both YRI and CEU samples show a continuous increase in the C>G/T>A ratio  
298 albeit of different magnitudes, while in the CHB, the ratio initially decreases and then stays  
299 relatively stable for roughly 900 generations. Interestingly, unlike the previous signal, inter-  
300 population differences in C>G/T>A remain highly significant for the most recent variants as well  
301 (0-55 generations), pointing to ongoing factors differentiating the relative rates of C>G and T>A  
302 mutations at present.

303  
304 Notably, the fraction of C>G in *de novo* germline mutations is particularly sensitive to parental  
305 ages, increasing rapidly with the mother's age at conception (Jónsson et al. 2017). This raises  
306 the possibility that the inter-population differences in C>G/T>A ratio are driven by different  
307 average maternal reproductive ages among populations (Macià et al. 2021). To test this  
308 hypothesis, we leveraged the regional enrichment of maternal C>G mutations (Jónsson et al.  
309 2017): "C>G enriched regions", defined as 10% of the genome with the highest C>G SNP density,  
310 contribute one-third of the overall maternal age effect (i.e., the yearly increase in maternal DNMs  
311 with mother's age). The C>G/T>A ratio within the C>G enriched regions alone does not show  
312 significant inter-population differences (Figure 2C), probably reflecting reduced power due to the  
313 much lower SNP counts in these regions (<15% of all). Outside of the C>G enriched regions, the  
314 three populations differ as much as they do genome-wide (Figure 2C), indicating that the  
315 differential accumulation of C>G mutations with maternal ages is not the primary driver of the  
316 differences observed across these populations.

317  
318 To determine whether the signal in C>G/T>A ratio is driven by differences between populations  
319 in C>G or T>A mutation rate, we performed two additional comparisons (T>G/T>A and  
320 C>G/C>A), substituting numerator or denominator in the ratio by another mutation type. Unlike



321 previous comparisons, these two comparisons are sensitive to the effects of gBGC, so the  
322 variation across time bins cannot be readily interpreted as evidence for an evolution of the  
323 mutation spectrum. However, if the inter-population differences are in the same direction (i.e.,  
324 rates in CHB<CEU<YRI), we can reason that the mutation type not being substituted (C>G or  
325 T>A) contributes to the inter-population differences. For T>G/T>A ratio, we still observed highly  
326 significant inter-population differences across the three populations, with CEU and YRI  
327 converging in recent time windows (Figure 2—figure supplement 6). Considering the C>G/C>A  
328 ratio, we also found subtle but significant differences during the period of 55–437 generations ago  
329 (Figure 2—figure supplement 6). These results suggest that the inter-population differences in  
330 the C>G/T>A ratio arise from differences in mutation rates in both numerator and denominator,  
331 with CHB having the highest T>A and lowest C>G rates, and YRI having the lowest T>A and  
332 highest C>G rates.

333

### 334 **Differences in the T>C/T>G ratios at deep timescales in the ancestors of all modern** 335 **humans**

336 The T>C/T>G ratios were higher in the three oldest bins (dated to >28,800 generations ago) than  
337 in more recent ones in all three population samples and that effect was more pronounced in YRI  
338 compared to CHB and CEU (Figure 2A). The difference seen between old polymorphisms  
339 observed in different contemporary populations is puzzling, because the majority of these variants  
340 long predate the OOA migration (~2,000-4,000 generations ago), and thus arose in the common  
341 ancestor of the three contemporary populations. To verify that these differences do not stem from  
342 inaccuracies in the polarization of ancestral and derived alleles, we repeated the analysis by  
343 determining the ancestral state on the basis of the chimpanzee reference genome (PanTro2;  
344 Materials and Methods); qualitatively similar results are obtained (Figure 2—figure supplement  
345 7A). We further tested the effect of reference bias by stratifying the human reference genome by  
346 inferred local ancestry and found qualitatively similar results in regions of European or African  
347 ancestry (Figure 2—figure supplement 7B) (Green et al. 2010).

348

349 One known difference between Africans and non-Africans, which could contribute to the  
350 difference between YRI and the other two population samples, is that most non-Africans derive  
351 ~1-3% of their genomic ancestry from Neanderthals, and some groups also have an additional  
352 contribution from Denisovans (Mallick et al. 2016). In contrast, sub-Saharan African populations  
353 have minimal (<0.1%) ancestry from these archaic hominins (Prüfer et al. 2014; Chen et al. 2020).  
354 In principle, it is therefore possible that the increased T>C/T>G ratio in old age bins is related to  
355 variants that arose in known archaic groups (Neanderthal or Denisovan) and introgressed into  
356 ancestors of non-Africans after the OOA migration. However, several observations argue against  
357 this hypothesis. First, the similar T>C/T>G ratios in CHB and CEU, combined with the much higher  
358 Denisovan ancestry in East Asians (Mallick et al. 2016), rule out Denivosan introgression as the  
359 major driver of the observed differences between the YRI and CEU and CHB. Second, the inter-  
360 population differences persist when previously identified introgression tracts of Neanderthal  
361 ancestry were removed from CEU and CHB (Sankararaman et al. 2014). Lastly, even if the  
362 Neanderthals and/or Denisovans had higher T>C/T>G ratio compared to modern humans, their  
363 introgression into ancestors of non-Africans could only explain the inter-population differences,  
364 not the large elevation in this ratio in YRI (Figure 2).

365

366 To our surprise, when we removed variants with derived alleles observed in both Neanderthals  
367 and Denisovans (i.e., ND11 variants, where 0 and 1 denote ancestral and derived alleles  
368 respectively), the T>C/T>G ratios in the oldest bins reduced to similar levels as the younger  
369 variants for all three populations, and the differences between YRI and the other two populations  
370 disappeared (Figure 2D); the same is not seen, however, when removing only the derived variants  
371 shared with either Neanderthal or Denisovan but not both (i.e., ND01 or ND10 variants; Figure  
372 2—figure supplement 8). Variants shared between Neanderthals, Denisovans, and modern  
373 humans (in particular YRI who have minimal archaic ancestry) likely arose in the common  
374 ancestral population before the split of the three groups (dated to 550,000-800,000 years ago;  
375 Prüfer et al. 2014), consistent with the age estimates of >29,000 generations for variants in the  
376 three oldest bins. Therefore, we hypothesize that the T>C/T>G ratio was higher in one or more  
377 populations in the remote past and those ancient groups contribute variable amounts of ancestry  
378 to contemporary populations due to incomplete lineage sorting, complex population structure, or  
379 differential gene flow from unknown ghost hominins (Durvasula and Sankararaman 2020;  
380 Ragsdale et al. 2022; Hammer et al. 2011).

381

382 Next, we examined if the elevated T>C/T>G ratio is related to increased T>C or reduced T>G  
383 mutations. Using alternative pairwise comparisons (T>C/T>A and T>A/T>G), we inferred that the  
384 signal is primarily driven by higher proportions of T>C mutations among older variants (Figure 2—  
385 figure supplement 9). Thus, it appears that the relative T>C mutation rate used to be higher in the  
386 ancestral population of modern humans (and some archaic humans) but decreased by ~29,000  
387 generations ago and stayed relatively stable until present. Moreover, Neanderthal-introgressed  
388 segments have a slightly lower fraction of T>C mutations and a higher fraction of T>G mutations  
389 (~1% relative difference in each fraction) (Skov et al. 2020). Therefore, Neanderthal introgression  
390 into the ancestors of non-Africans could have the effect of further lowering the T>C/T>G ratio in  
391 non-Africans. Nonetheless, this effect alone would be insufficient to explain the ~4.4% difference  
392 genome-wide in the T>C/T>G ratio between YRI and non-African populations (CEU or CHB) in  
393 the older bins (Figure 2D), as only a small fraction (~1-3%) of non-Africans ancestry is derived  
394 from Neanderthals.

395

396 Given the possible differences in mutation spectrum across ancestral populations that contributed  
397 differentially to contemporary populations, a potential concern is that some variants that actually  
398 arose before OOA could be incorrectly dated and lead to apparent differences between  
399 contemporary populations even at recent timescales. To address this concern, we excluded  
400 derived variants shared by either Neanderthals or Denisovans from further analysis. This filtering  
401 removes ancestral polymorphisms segregating in modern humans due to incomplete lineage  
402 sorting or introgression from Neanderthals, Denisovans or any unknown ghost population related  
403 to either of them. After removing these variants, we still found the elevation of C>T/C>A ratio at  
404 nonCpG sites in CEU and C>G/T>A divergence among populations (Figure 2—figure supplement  
405 10). This result confirms that these two signals are not related to mis-dated ancient variants  
406 segregating in human populations.

407

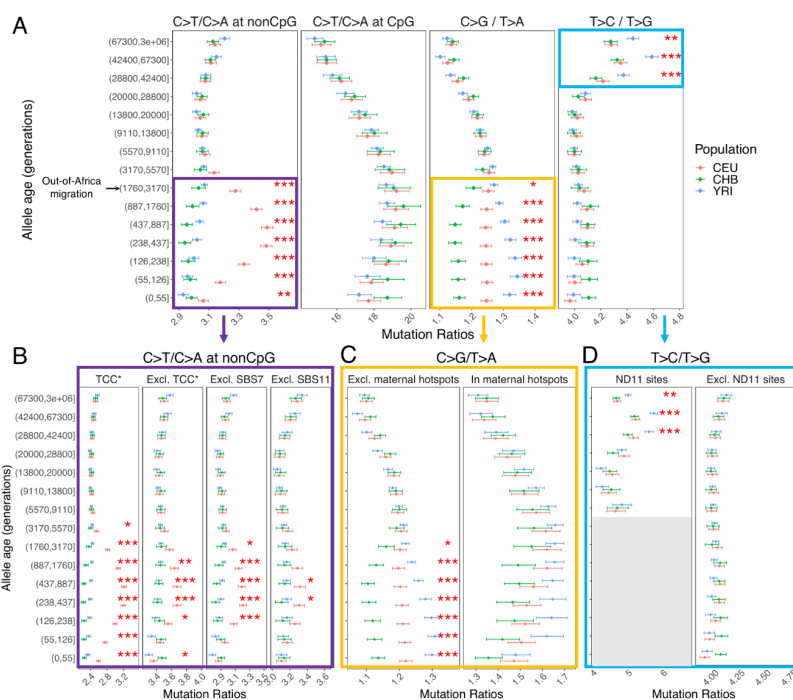

408  
 409 **Figure 2.** Pairwise comparisons of polymorphisms arising in different time windows. (A) Four  
 410 pairwise mutation ratios are shown, each of which compares two mutation types that are matched  
 411 for mutational opportunity and effects of gBGC. The black arrow indicates the window coinciding  
 412 with the OOA migration. Highlighted in boxes are three ratios that show significant inter-population  
 413 differences, with in-depth investigation into each shown in lower panels. Asterisks refer to the p-  
 414 value obtained from a Chi-square test after a Bonferroni correction for 60 tests: \* for  $P < 0.01$ , \*\*  
 415 for  $P < 0.0001$  and \*\*\* for  $P < 10^{-8}$ . (B) CEU-specific elevation in C>T/C>A ratio at nonCpG sites,  
 416 after excluding the four trinucleotide contexts (TCC, TCT, CCC, and ACC) previously identified to  
 417 be associated with the TCC pulse in Europeans (denoted by TCC\*; Harris and Pritchard, 2017),  
 418 as well as contexts affected by COSMIC mutational signatures of SBS7 and SBS11 (Harris 2015;  
 419 Mathieson and Reich 2017); (C) Post-OOA divergence in C>G/T>A ratio among three population  
 420 groups; and (D) Higher T>C/T>G ratio in YRI than CEU and CHB samples among extremely old  
 421 variants, driven by ND11 variants (data are not shown for ND11 variants in recent windows, as  
 422 there are few such variants whose estimated ages fall in those windows).

423  
 424 The following figure supplements are available for Figure 2:

425  
 426 **Figure supplement 1.** Pairwise polymorphism ratios in three additional populations from Africa  
 427 (LWK), Europe (TSI), and East Asia (JPT) in the 1000 Genomes project.

428 **Figure supplement 2.** Pairwise polymorphism ratios in genomic regions with a minimal effect of  
 429 background selection (B-score >800).

430 **Figure supplement 3.** Pairwise polymorphism ratios in 33% of the genome with the lowest (A)  
 431 and highest (B) regional recombination rates.

432 **Figure supplement 4.** Pairwise ratios of human polymorphisms stratified by allele frequency.

433 **Figure supplement 5.** Pairwise polymorphism ratios in YRI, CEU, and CHB in commonly  
 434 accessible regions based on alternative binning strategies.

435  
436 **Figure supplement 6.** Alternative pairwise polymorphism ratios (T>G/T>A and C>G/C>A), used  
437 to investigate the cause of inter-population differences in C>G/T>A ratio.  
438 **Figure supplement 7.** Replication of the T>C/T>G signal with an alternative derived allele  
439 polarization and stratification by the local ancestry of the reference genome.  
440 **Figure supplement 8.** T>C/T>G ratio in YRI, CEU and CHB excluding variants for which the  
441 derived alleles are also found in Denisovans (A), Neanderthals (B), and both (C).  
442 **Figure supplement 9.** Alternative pairwise polymorphism ratios (T>C/T>A and T>A/T>G), used  
443 to investigate the cause of inter-population differences in T>C/T>G ratio.  
444 **Figure supplement 10.** Pairwise polymorphism ratios in YRI, CEU, and CHB in commonly  
445 accessible regions excluding variants shared with Neanderthals and/or Denisovans (e.g., ND01,  
446 ND10 and ND11).  
447

#### 448 **Parental age effects on the mutation spectrum**

449 To explore whether the inter-population differences in polymorphism data could be driven by  
450 changing mean generation times over evolution (Macià et al. 2021), we turned to genomic data  
451 from pedigrees and quantified the parental age effects on the pairwise ratios of *de novo* mutations  
452 (DNMs) at present day (Materials and Methods. To maximize the power and precision, we  
453 focused on the largest publicly available DNM dataset, which includes 200,435 *de novo* single  
454 nucleotide mutations from 2,976 Icelandic trios (Halldorsson et al. 2019). The inferred parental  
455 age effects based on a previous, smaller DNM dataset were qualitatively similar (Figure 3—figure  
456 supplement 1), despite some significant differences across datasets, possibly due to systematic  
457 differences in the criteria for identifying and filtering DNMs (Figure 3—figure supplement 2).  
458

459 Considering the four pairwise mutation ratios, which are mathematically independent, three show  
460 a significant dependence on parental age (Figure 2). As an illustration, if both parents reproduce  
461 at 40 years rather than at 20 years of age, the ratios of nonCpG C>T/C>A and T>C/T>G decrease  
462 by 9.8% (90% confidence interval (CI): 4.9%-14.7%) and 7.5% (CI: 1.8%-13.7%) respectively,  
463 whereas the C>G/T>A ratio increases by 11.6% (90% CI: 3.3%-19.8%). In terms of sex-specific  
464 effects (Figure 3—figure supplement 3), nonCpG C>T/C>A and T>C/T>G ratios were largely  
465 determined by the paternal age and much less so the maternal age, reflecting that the paternal  
466 age effect is 3-4-fold stronger than maternal age effect for these mutation types (Kong et al. 2012;  
467 Jónsson et al. 2017; Goldmann et al. 2018). For C>G/T>A ratio, however, the maternal age is  
468 nearly as important as the paternal age, consistent with the unusually strong maternal age effect  
469 on C>G mutations (Jónsson et al. 2017).  
470

471 We were unable to directly quantify the dependence of CpG C>T/C>A ratio on parental ages,  
472 because the low count of C>A mutations at CpGs (on average 0.55 DNMs per trio) limited our  
473 ability to reliably infer the parental age effects (Materials and Methods). However, a previous study  
474 noted that the fraction of CpG C>T mutations among all DNMs depends strongly on parental age  
475 and decreases by 0.26% per year (Jónsson et al. 2017). Consistent with this finding, the ratio of  
476 the counts of CpG C>T and CpG C>A DNMs in the 20%-tile of trios with the youngest parents is  
477 significantly higher than in the 20%-tile of trios with the oldest parents (21.0 vs. 17.4,  $P=0.03$  by

478 Chi-square test). This difference suggests the ratio of C>T to C>A mutations at CpG sites  
 479 decreases with the parental age. Overall, the significant age-dependency of three—and likely all—  
 480 of the four pairwise mutation ratios highlights the pervasive influence of reproductive ages on the  
 481 human germline mutation spectrum.  
 482

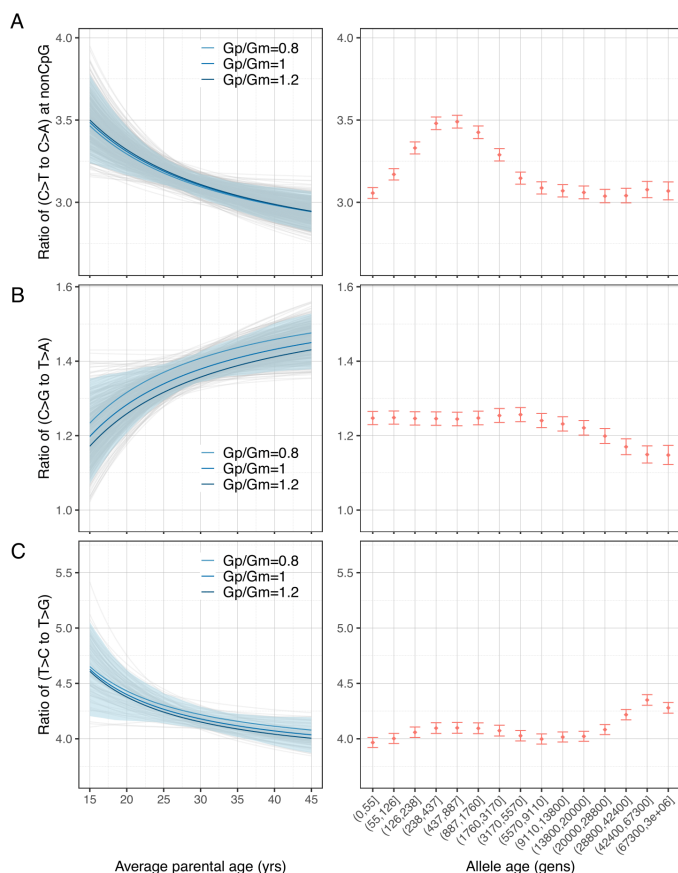

483  
 484 **Figure 3** Effects of parental ages on three pairwise mutation ratios estimated from DNM data in  
 485 2,879 Icelandic trios (Halldorsson et al. 2019). The different curves reflect expectations for  
 486 different ratios of paternal (Gp) to maternal (Gm) mean generation times. Each light gray curve  
 487 represents the expected ratio for Gp/Gm=1 from one bootstrap resampling replicate (see  
 488 Materials and Methods), with the lighter blue area denoting 90% confidence interval (CI) assessed  
 489 from 500 replicates. For ease of comparison, ratios for polymorphisms of different ages identified  
 490 in CEU are shown on the right of each panel. The points represent the observed polymorphism  
 491 ratios, while the whiskers denote the 95% CI assuming a binomial distribution of polymorphism  
 492 counts. All results are based on variants in the commonly accessible regions, excluding those  
 493 with derived alleles observed in either Neanderthal or Denisovan.

494  
 495 The following source data and figure supplements are available for Figure 3:  
 496 **Source data 3:** Mutation parameters inferred from DNM data in 2,879 Icelandic trios with  
 497 estimated uncertainty based on bootstrap resampling (one file for each mutation type for  
 498 commonly accessible regions excluding archaic sites;  $n=500$  replicates).

499  
500 **Figure supplement 1.** Effects of parental ages on three pairwise mutation ratios estimated from  
501 an earlier DNM dataset (Jónsson et al. 2017).

502 **Figure supplement 2.** Discrepancies in the mutation spectrum between different DNM datasets  
503 and between DNMs and young polymorphisms.

504 **Figure supplement 3.** Sex-specific parental age effects on three pairwise mutation ratios.  
505

## 506 **Shifts in generation times needed to explain the observed changes in the polymorphism** 507 **data**

508 Motivated by the strong dependency of DNM ratios on parental ages, we tested the hypothesis  
509 that changes in past generation times account for the observed mutation spectrum of  
510 polymorphism data, as suggested by a couple of recent studies (Macià et al. 2021; Wang et al.  
511 2021). In particular, we asked whether the temporal shifts in the pairwise polymorphism ratios  
512 could be fully explained by shifts in average reproductive ages, i.e., without the need to invoke  
513 additional factors. As the mutation process may have evolved somewhat separately in different  
514 human populations, we focused the comparison of DNMs to variants identified in CEU, who are  
515 most genetically similar to the Icelandic individuals (with  $F_{ST} < 0.005$ ) for whom we have the  
516 largest DNM dataset (Halldorsson et al. 2019).

517  
518 Assuming the observed changes in the mutation spectrum are solely driven by shifts in average  
519 reproductive ages, we inferred past generation times by relating observed pairwise ratios in DNM  
520 data and polymorphism data. Specifically, for a given pairwise mutation ratio in the polymorphism  
521 data, we asked what value of the generation time is compatible with the relationships to age  
522 estimated from pedigree data (assuming an identical male to female generation time and a fixed  
523 onset of puberty). Accounting for uncertainty in the DNM data, we then inferred the 95%  
524 confidence interval of the generation time for each mutation ratio and time window. Given the  
525 complications with low numbers of CpG mutations in DNMs data and of recurrent mutations at  
526 CpG sites in polymorphism data, we excluded the pairwise ratio of C>T/C>A at CpGs for this  
527 analysis.

528  
529 Solving each of the three pairwise ratios over time, we inferred inconsistent values of generation  
530 times across different mutation types within a single time window and discrepant trends across  
531 time windows. For instance, the steady increase in C>G/T>A ratio over time translates into a  
532 gradual increase in reproductive age, with the ratio of the most recent bin corresponding to a  
533 reproductive age under 23 years (Figure 3C; Figure 4). In contrast, the T>C/T>G polymorphism  
534 ratio appears to be lower than the ratio in *de novo* mutations across the range of typical parental  
535 ages in pedigree studies and suggests a generation time of more than 40 years (Figure 3C). Such  
536 a long population-average generation time is not only inconsistent with the estimate of the  
537 C>G/T>A ratio, but it is also unrealistic for human evolution (Fenner 2005; Moorjani,  
538 Sankararaman, et al. 2016). Finally, the transient elevation in nonCpG C>T/C>A ratio suggests a  
539 drastic, rapid reduction in the generation time (Figure 3A; Figure 4). Specifically, the ratios of both  
540 ancient (>5,670 generations ago) and the most recent polymorphisms (<55 generations ago)

541 correspond to relatively old reproductive ages of ~35 years, while the peak at around 238-887  
542 generations ago provides average reproductive age estimates of less than 20 years (Figure 4).

543  
544 The incompatible patterns across different mutation ratios could potentially arise if male and  
545 female generation times differed in the past. To explore this possibility, we varied the ratio of male  
546 and female generation times between 0.8–1.2, as seen across a range of contemporary human  
547 populations ((Fenner 2005); Figure 4—figure supplement 1; Figure 4—figure supplement 2). We  
548 further allowed male and female generation times to vary freely and inferred the combinations of  
549 paternal and maternal ages that could give rise to the observed polymorphism ratios. Even after  
550 modeling sex-specific reproductive ages, we found inconsistent generation time estimates and  
551 incompatible trends across mutation ratios (Figure 4—figure supplement 3). Overall, our results  
552 suggest that shifts within a plausible range of human generation times—i.e., those that fall within  
553 the range of puberty and reproductive cessation in humans—cannot explain the observed variation  
554 in the polymorphism data for CEU, and by analogy are unlikely to explain the mutation ratios in  
555 CHB or YRI polymorphisms.

556

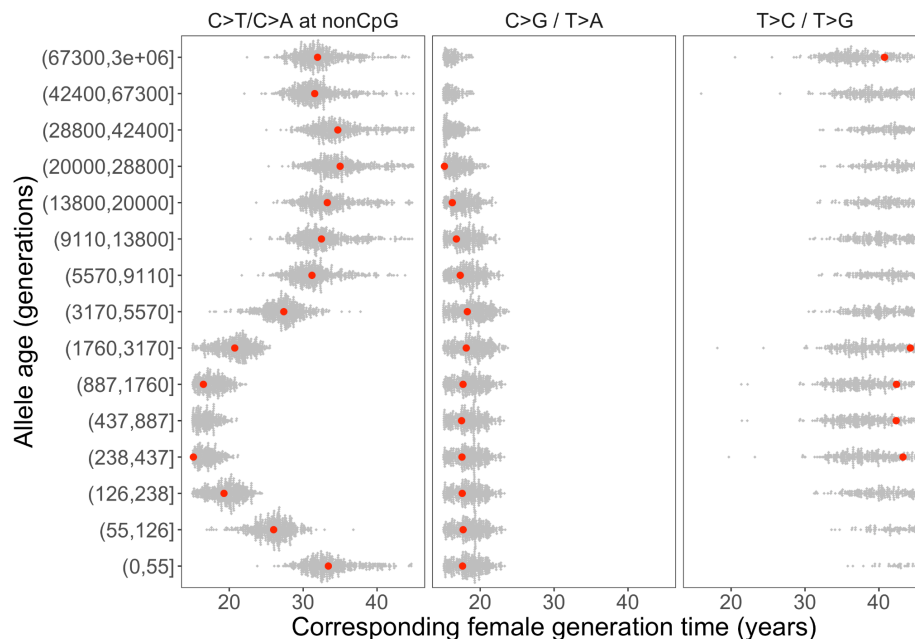

557  
558 **Figure 4** Past generation times corresponding to the observed polymorphism ratios in CEU,  
559 given parental age effects estimated from DNM data. Red points represent the point estimates  
560 based on maximum likelihood estimators of mutation parameters from the DNM data; gray dots  
561 show estimates from 500 bootstrap replicates by resampling trios with replacement. We assumed  
562 the same male to female generation times ( $G_p=G_m$ ) for all time windows. Similar trends were  
563 obtained for other fixed values of  $G_p/G_m$  (between 0.8-1.2) or independent  $G_p$  and  $G_m$  (Figure  
564 4—figure supplement 1; Figure 4—figure supplement 3)

565

566 The following source data and figure supplements are available for figure 4:

567

568 **Source data 4:** Past generation times inferred from each polymorphism ratio, assuming fixed  
569 ratios of male to female generation times ( $G_p/G_m=0.8, 1, 1.2$ ), with confidence intervals  
570 estimated using bootstrap resampling ( $n=500$  replicates; one file for each mutation type).

571  
572 **Figure supplement 1.** Past generation times inferred from the observed pairwise polymorphism  
573 ratios, assuming a fixed ratio of male to female generation times of (A)  $G_p/G_m=0.8$  , or (B)  
574  $G_p/G_m=1.1$ , or (C)  $G_p/G_m=1.2$  .

575 **Figure supplement 2.** Past generation times corresponding to the observed pairwise  
576 polymorphism ratios, based on parental age effects estimated from an earlier DNM dataset  
577 (Jónsson et al. 2017).

578 **Figure supplement 3.** Combinations of paternal and maternal reproductive ages corresponding  
579 to the observed pairwise polymorphism ratios.

## 580 Discussion

581  
582 **Multiple changes in the germline mutation spectrum during the course of human evolution**  
583 We introduced a new framework to compare the mutation spectrum over time and across  
584 population samples, while controlling for the effects of selection and biased gene conversion. By  
585 applying this approach to multiple population samples from the 1000 Genomes Project dataset,  
586 we identified three signatures of inter-population differences. Notably, we replicated the transient  
587 elevation in non-CpG C>T mutation (manifest in the C>T/C>A ratio) identified previously in  
588 Europeans compared to East Asians and Africans (Harris 2015; Harris and Pritchard 2017;  
589 Mathieson and Reich 2017; Speidel et al. 2019). We found that this ratio also differs weakly  
590 between YRI and CHB, suggesting an additional change occurred in this mutation type. In both  
591 cases, the signal is enriched in the TCC, TCT, CCC, and ACC contexts, and previously identified  
592 COSMIC signatures of SBS7 and SBS11 which are associated with exposure to UV and alkylating  
593 agents. While these contexts may contribute to this signal, we show that they do not fully explain  
594 the observed differences between contemporary populations. Thus, the etiology of this signal  
595 remains obscure, and it may not be specific to Europeans. Further investigation into the extended  
596 sequence contexts of this mutation pulse may help elucidate the underlying molecular  
597 mechanism(s) (Aggarwala and Voight 2016; Aikens, Johnson, and Voight 2019).

598  
599 We also identified two novel inter-population differences in the mutation spectrum. First, the ratio  
600 of C>G/T>A mutation rates differs between the three populations considered. We found that this  
601 signal is related to an increase in T>A mutations and depletion of C>G mutations in CHB  
602 compared to CEU, as well as a depletion of T>A mutations in YRI. Some aspects of this  
603 observation (e.g., the enrichment of T>A mutations in East Asians) were previously noted (Harris  
604 and Pritchard 2017), and our analysis added information about the timing of this variation. Given  
605 the distinct trends of T>A and C>G mutations with allele age (Figure 2—figure supplement 6), at  
606 least two changes in the mutational processes are needed to explain the inter-population  
607 differences. Interestingly, these differences are still observed in the most recent polymorphisms,  
608 indicating that—unlike the TCC mutation pulse—this process is likely ongoing. This finding



609 therefore points to an opportunity to directly examine and map the underlying biological causes  
610 using large-scale *de novo* mutation datasets from these populations.

611  
612 Unexpectedly, we detected significant differences between YRI and the other two populations,  
613 CEU and CHB, in the mutation spectra of polymorphisms that are estimated to long predate the  
614 OOA migration. Specifically, the T>C/T>G mutation ratio is elevated in the very old allele age bins  
615 compared to more recent bins for all populations, with a significantly higher ratio seen in YRI than  
616 in CEU and CHB. We showed that the inter-population differences cannot be explained by  
617 differential gene flow from sequenced archaic hominins—Neanderthals or Denisovans—into the  
618 ancestors of non-Africans and such introgression alone cannot explain the shift in the older bins  
619 in all modern human populations.

620  
621 Instead, we found evidence that the signals come from extremely old variants that emerged prior  
622 to the split of modern humans and archaic hominins at least ~550,000 years ago (Prüfer et al.  
623 2014). This suggests that the observed differences between contemporary populations could  
624 have arisen from the complex demographic history of ancestral populations. Based on observed  
625 polymorphism patterns in contemporary African populations and using simulations, several recent  
626 studies have suggested that one or more ghost archaic populations may have introgressed into  
627 the ancestors of Africans and possibly into the common ancestors of all modern humans (Hammer  
628 et al. 2011; Ragsdale and Gravel 2019; Speidel et al. 2019; Durvasula and Sankararaman 2020).  
629 After the ancestors of non-Africans migrated out of Africa, the ghost archaic group(s) may have  
630 continued interbreeding with remaining populations in Africa, leading to higher ancestry in YRI.  
631 An alternative model is deep population structure in modern humans. Under this model, two or  
632 more long-lasting, weakly differentiated ancestral populations contributed differentially to  
633 contemporary human populations through continuous gene flow or multiple merger events  
634 (Ragsdale et al. 2022). In both models, a greater contribution from a group with a higher T>C/T>G  
635 ratio to the ancestors of African individuals would explain differences between YRI and non-  
636 African population samples as well as the elevated ratio in old variants for all three contemporary  
637 human populations. Our analysis further showed that the T>C/T>G signal comes from T>C  
638 mutations rather than T>G mutations, suggesting that one or more of the remote ancestral  
639 populations had a higher T>C mutation rate relative to their contemporaries as well as to modern  
640 humans.

641  
642 **Interpretation of inter-population differences in the mutation spectrum**  
643 Although the three population samples that we focused on here were collected from three distinct  
644 continents, the observed differences among them are not necessarily generalizable to the  
645 continental level. In particular, within the same continent, and notably in Africa, there is relatively  
646 deep genetic divergence between some populations (e.g., between Bantu groups and Khoe-San),  
647 often accompanied by long-term geographic isolation and environmental differences (Mallick et  
648 al. 2016). These different histories could lead to considerable variation in the mutation processes  
649 within a continent. In fact, even for closely related populations, we detected subtle but significant  
650 differences in the polymorphism ratios (e.g., between CEU and TSI in Figure 2—figure  
651 supplement 1). Genetic data from more diverse populations, in terms of both ancestry and

652 geographic location, are needed to generate a more complete picture of past and ongoing  
653 variation in the mutation spectrum among human populations and to understand its evolution.

654

### 655 **Changes in generation times cannot explain the evolution of the mutation spectrum**

656 Across mammals, the generation time is the strongest predictor of the yearly mutation rate and of  
657 some aspects of the mutation spectrum (Wu and Li 1985; Hwang and Green 2004; Moorjani,  
658 Amorim, et al. 2016). Recent studies have suggested that changes in generation times can also  
659 explain the differences in mutation spectrum observed between human populations (Macia et al  
660 2021). Indeed, our analysis of *de novo* mutations from pedigree studies shows significant effects  
661 of parental ages on all four pairwise mutation ratios that we examined.

662

663 On that basis, it has been suggested that the population-specific mutation spectrum can be  
664 leveraged to infer the historical generation time in humans (Macià et al. 2021; Wang et al. 2021).  
665 In practice, there are several technical hurdles. First, given the sampling noise associated with  
666 the limited number of *de novo* mutations per family, large numbers of pedigrees are required to  
667 characterize the parental age effects reliably, especially for specific mutation types. In our  
668 analysis, we used the largest available pedigree dataset, but the parental age effects remain  
669 imprecisely estimated and should be revisited as larger datasets become available, ideally from  
670 diverse populations. Second, technical issues, both molecular and computational, may affect the  
671 reliability of variant calls of different mutation types to varying degrees (Bergeron et al. 2021).  
672 Indeed, we found that the four pairwise ratios differ significantly across three recent pedigree  
673 datasets, as well as between *de novo* mutations and young polymorphisms in 1000 Genomes  
674 dataset, which are unlikely to be reconciled by biological reasons (Figure 3—figure supplement  
675 2). Finally, controlling for the effects of biased gene conversion is difficult, as its effects may differ  
676 to some extent by mutation type even within a class (e.g., T>C and T>G both classified as S>W  
677 mutations may be subject to differing strengths of BGC).

678

679 While these technical limitations likely influence the absolute values of the inferred generation  
680 times, the temporal trends, whether increasing or decreasing, should be robust to technical  
681 biases. In that regard, it is striking that the trends in generation times estimated from different  
682 mutation ratios are mutually inconsistent (Figure 4). These inconsistencies persist after  
683 accounting for uncertainty in the parental age effects inferred from pedigrees and incorporating  
684 sex-specific reproductive ages. Our findings therefore reveal that there is no single value or  
685 trajectory of generation times that can account for the observed patterns at all mutation ratios  
686 across time windows simultaneously. In other words, generation time alone cannot be the sole  
687 driver of the mutation spectrum over the course of human evolution.

688

### 689 **Implications**

690 The mutation spectrum of polymorphisms is a convolution of multiple evolutionary forces:  
691 mutation, recombination (including gene conversion), natural selection, and demography. In this  
692 study, we investigated the contribution of these forces to differences in the mutation spectrum  
693 between contemporary human populations. Notably, we identified an unexpected role of  
694 demographic history in shaping variants that long predate the OOA migration, due either to deep  
695 population structure or to introgression from unknown ghost hominin population(s). Complex

696 demographic history alone cannot lead to inter-population differences in the mutation spectrum,  
697 so changes in the mutational processes must have happened in the ancestral populations;  
698 however, incorrect or incomplete demographic models may misguide interpretation of the timing  
699 and source of mutation rate evolution. For future studies aiming to understand the evolution of  
700 mutagenesis based on analyses of polymorphism patterns, it will be crucial to consider and model  
701 the impact of these non-mutational evolutionary forces.

702  
703 Our analysis further demonstrates the limitations in inferring past generation times based on  
704 polymorphism patterns. The approach relies on the assumption that changes in the generation  
705 time play the sole (or a predominant) role in the evolution of the mutation spectrum. Yet we found  
706 that shifts in generation time could not explain the observed variations in the mutation spectrum  
707 on their own, leaving a non-negligible role for other factors—such as transient environmental  
708 exposures, genetic modifiers and other life history traits (e.g., changes in the onset of puberty)—  
709 in shaping the mutation landscape in human populations. This conclusion is in line with recent  
710 studies in model organisms that discovered naturally occurring genetic modifiers (Jiang et al.  
711 2021; Sasani et al. 2021) as well as a human pedigree study that identified individuals with  
712 germline hypermutation potentially due to genetic modifiers or exposures to chemotherapeutic  
713 agents (Kaplanis et al. 2021).

714  
715 The variation in the mutation spectrum over the course of human evolution raises a fundamental  
716 puzzle about why the molecular clock works over long timescales and across species. Our  
717 analyses uncovered substantial variation in multiple pairwise mutation ratios at different time  
718 depths during human evolution. Since variation in each pairwise ratio suggests mutation rate  
719 variation for at least one (or both) of the mutation types involved, our findings suggest that the  
720 absolute mutation rate per year of several mutation types must have been evolving. For example,  
721 our result suggests the mutation rate for C>T mutations at nonCpG sites varied by ~15-20% in  
722 CEU over the past 3,000 generations. Over longer timescales, it is likely that all mutation types  
723 deviate from a strictly clock-like behavior. It is puzzling then that the mutation rates across species  
724 are strikingly similar over millions of years: for instance, the substitution rate differs by less than  
725 10% percent for any mutation type in the human and chimpanzee lineages (Moorjani, Amorim, et  
726 al. 2016). This observation suggests that although the mutation rate and spectrum can evolve  
727 over relatively short timescales, the fluctuations in mutation rate often average out over longer  
728 timescales, possibly reflecting the effects of long-term stabilizing selection.

729

730

## 731 **Materials and Methods**

732

### 733 **Data availability**

734 All datasets analyzed here are publicly available at the following websites:

735

| Dataset | Source | Reference |
|---------|--------|-----------|
|---------|--------|-----------|

|                                                                                |                                                                                                                                                                                               |                                               |
|--------------------------------------------------------------------------------|-----------------------------------------------------------------------------------------------------------------------------------------------------------------------------------------------|-----------------------------------------------|
| High coverage 1000 Genomes Project                                             | <a href="https://www.internationalgenome.org/data-portal/data-collection/30x-grch38">https://www.internationalgenome.org/data-portal/data-collection/30x-grch38</a>                           | (Byraska-Bishop et al., 2021)                 |
| Low coverage 1000 Genomes Project                                              | <a href="http://www.1000genomes.org/category/phase-3/">http://www.1000genomes.org/category/phase-3/</a>                                                                                       | (1000 Genomes Project Consortium et al. 2015) |
| Archaic genomes: Neanderthal and Denisovans                                    | <a href="http://cdna.eva.mpg.de/neandertal/">http://cdna.eva.mpg.de/neandertal/</a>                                                                                                           | (Meyer et al. 2012; Prüfer et al. 2014)       |
| Introgressed regions from Neanderthals identified in non-Africans              | <a href="https://reich.hms.harvard.edu/datasets/landscape-neandertal-ancestry-present-day-humans">https://reich.hms.harvard.edu/datasets/landscape-neandertal-ancestry-present-day-humans</a> | (Sankararam et al. 2014)                      |
| Introgressed regions from unknown ghost archaic hominin identified in Africans | <a href="https://drive.google.com/file/d/1Q7iEdjCf7d4HnI65_JzjIYnsDP8G0ly8/view">https://drive.google.com/file/d/1Q7iEdjCf7d4HnI65_JzjIYnsDP8G0ly8/view</a>                                   | (Durvasula and Sankararaman 2020)             |
| Decode <i>de novo</i> mutations 2019 (2,976 families)                          | <a href="https://www.science.org/doi/10.1126/science.aau1043">https://www.science.org/doi/10.1126/science.aau1043</a>                                                                         | (Halldorsson et al. 2019)                     |
| Decode <i>de novo</i> mutations 2017 (1,548 families)                          | <a href="https://www.nature.com/articles/nature24018#additional-information">https://www.nature.com/articles/nature24018#additional-information</a>                                           | (Jónsson et al. 2017)                         |

|                                                         |                                                                                                   |                        |
|---------------------------------------------------------|---------------------------------------------------------------------------------------------------|------------------------|
| Goldman <i>de novo</i> mutations 2016<br>(806 families) | <a href="https://pubmed.ncbi.nlm.nih.gov/27322544/">https://pubmed.ncbi.nlm.nih.gov/27322544/</a> | (Goldmann et al. 2016) |
|---------------------------------------------------------|---------------------------------------------------------------------------------------------------|------------------------|

736

737

738

### Data filtering and partitions used in the analysis

739

740

**Commonly accessible regions:** In order to reliably compare mutation patterns across datasets, we generated a list of genomic regions that were “accessible” or assayed by the study after accounting for the constraints of the study design. To generate this list, we first followed the variant calling procedure described in Jonsson et al. 2017 to identify the accessible genome for *de novo* studies. This yielded an accessible genome length of 2.7 Gb similar to the estimate reported in the original study (Jónsson et al. 2017). We intersected this dataset with the 1000 Genomes Strict Mask (see Resources below). We used the strict mask generated using low coverage 1000 Genomes dataset as it encompasses a larger set of low complexity regions and thus may port well across datasets. Further, to focus on putatively neutral regions, we removed exons and phylogenetically conserved regions sources). The combined set of accessible autosomal regions contained 2.15 Gb. Unless otherwise stated, we present all results generated for this subset of the autosomal genome, which we refer to as the “commonly accessible” regions.

752

753

**Regions of high and low recombination rate:** To study the impact of recombination rate on mutation patterns, we divided the genome into bins sorted by recombination rate using the high-resolution recombination map inferred from over 126,000 meioses in Icelandic pedigrees (Halldorsson et al. 2019). Briefly, for each position in the genome, we interpolated the recombination rate (excluding regions that fell outside the span of regions provided in (Halldorsson et al. 2019)). We then sorted all genomic sites by interpolated recombination rate and divided the genome into three discrete bins with recombination rates of  $(0, 2.6 \times 10^{-4}]$ ,  $(2.6 \times 10^{-4}, 6.3 \times 10^{-2}]$ , and  $(\times 10^{-2}, \infty)$  cM/Mb, each containing roughly 33% of the genomic bases.

760

761

**B-statistic or B-scores:** To focus on regions of the genome that are minimally affected by linked selection, we assigned a B-score to each variant site in a population. The B-score measures the expected reduction in diversity levels at a site due to background selection, with smaller values implying greater effects of background selection. We used the B-score values provided by (McVicker et al. 2009). We then compared the mutation patterns within windows of different values of B-scores. Additionally, where specified, we used the list of effectively neutral regions that contains the commonly accessible regions with a B-score > 800. This subset of the genome includes 1.33 Gb.

768

769

**Archaic regions:** To explore the source of differences across human populations and their relationship to archaic hominins, we annotated variants in modern humans according to whether

770

771 they shared the derived allele with Neanderthals (Vindija or Altai) or Denisovans (Altai), where 0  
 772 and 1 denote ancestral and derived alleles respectively. We generated three sets of variants:  
 773 ND10: Neanderthals have the derived allele, but Denisovans have the ancestral allele. This set  
 774 includes ~2,500,000 sites (not all of which are segregating variants in contemporary human  
 775 populations).  
 776 ND01: Neanderthals have the ancestral allele, but Denisovans have derived allele. This set  
 777 includes ~2,100,000 sites.  
 778 ND11: Both Neanderthals and Denisovans both have the derived alleles. This set includes  
 779 ~15,200,000 sites.  
 780 ND: Either Neanderthals or Denisovans have a derived allele. This set includes ~19,800,000 sites.  
 781 ND00: Neither Neanderthals nor Denisovans have a derived allele, while modern humans have  
 782 derived alleles (i.e., all accessible sites excluding ND sites). Most of these sites have the ancestral  
 783 allele in archaic hominins, though some derived variants may be missing or of low quality in  
 784 archaic genomes (thus not annotated in the VCF file).

785

786 Resources

787

| Dataset                  | Source                                                                                                                                                                                                    |
|--------------------------|-----------------------------------------------------------------------------------------------------------------------------------------------------------------------------------------------------------|
| 1000 Genomes Strict Mask | <a href="https://www.internationalgenome.org/announcements/genome-accessibility-masks/">https://www.internationalgenome.org/announcements/genome-accessibility-masks/</a>                                 |
| Recombination rate map   | <a href="https://www.science.org/doi/10.1126/science.aau1043">https://www.science.org/doi/10.1126/science.aau1043</a>                                                                                     |
| B-scores                 | <a href="https://journals.plos.org/plosgenetics/article?id=10.1371/journal.pgen.1000471">https://journals.plos.org/plosgenetics/article?id=10.1371/journal.pgen.1000471</a>                               |
| Conserved regions        | <a href="http://hgdownload.cse.ucsc.edu/goldenPath/hg38/database/phastConsElements46wayPrimates.txt.gz">http://hgdownload.cse.ucsc.edu/goldenPath/hg38/database/phastConsElements46wayPrimates.txt.gz</a> |
| Coding regions           | <a href="http://hgdownload.cse.ucsc.edu/goldenPath/hg38/database/refGene.txt.gz">http://hgdownload.cse.ucsc.edu/goldenPath/hg38/database/refGene.txt.gz</a>                                               |
| Human ancestral genome   | <a href="http://web.corrall.tacc.utexas.edu/WGSAdownload/resources/homo_sapiens_ancestor_GRCh38_e86">http://web.corrall.tacc.utexas.edu/WGSAdownload/resources/homo_sapiens_ancestor_GRCh38_e86</a>       |

|                                  |                                                                                                                                                                               |
|----------------------------------|-------------------------------------------------------------------------------------------------------------------------------------------------------------------------------|
| COSMIC signatures (v3.2, GRCh38) | <a href="https://cancer.sanger.ac.uk/signatures/documents/453/COSMIC_v3.2_SBS_GRCh38.txt">https://cancer.sanger.ac.uk/signatures/documents/453/COSMIC_v3.2_SBS_GRCh38.txt</a> |
|----------------------------------|-------------------------------------------------------------------------------------------------------------------------------------------------------------------------------|

788

## 789 **Relate analysis**

790 We applied Relate v1.1.5 (Speidel et al. 2019) to phased whole genome sequences from the 1000  
791 Genomes Project (see Datasets). The 1000 Genomes data was phased and imputed statistically  
792 (Byrska-Bishop et al., 2021). As a result most singletons are missing in the phased data. We  
793 focused on biallelic SNPs only using VCFtools (`--remove-indels --min-alleles 2 --max-alleles 2`)  
794 (Danecek et al. 2011). We then converted VCFs to haps/sample format using RelateFileFormats  
795 (`--mode ConvertFromVcf`) and prepared the input files using PrepareInputFiles.sh provided by  
796 Relate. We used 1000 Genomes Pilot Mask as the genome accessibility filter and the 6-EPO  
797 human ancestral genome to identify the most likely ancestral allele for each SNP. We assumed  
798 a mutation rate ( $m$ ) of  $1.25 \times 10^{-8}$  per base pair per generation and an effective population size  
799 ( $N$ ) of 30,000 (Jónsson et al. 2017). We used the Hapmap II genetic map (1000 Genomes Project  
800 Consortium et al. 2015). For each population, we inferred the mutation ages by splitting the Relate  
801 output genealogies into subtrees for each population using RelateExtract (`--mode`  
802 `SubTreesForSubpopulation`) and re-estimated the branch lengths (using  
803 EstimatePopulationSize.sh) to obtain the final mutation ages and the associated uncertainty  
804 (upper and lower bounds). For each mutation, we then inferred the upstream and downstream  
805 base pair based on the human ancestral genome. We annotated if the variant has a derived allele  
806 in Neanderthals and Denisovans using the publicly available genomes for Vindija Neanderthal,  
807 Altai Neanderthal and Altai Denisovan genome (see Datasets) and if it was previously identified  
808 as in a region that introgressed from Neanderthals (Sankararaman et al. 2014). Unless otherwise  
809 stated, we present the results for the commonly accessible regions.

810

## 811 **Binning of polymorphisms based on mutation age**

812 There is large uncertainty in the mutation ages estimated by Relate, such that the estimated lower  
813 and upper bounds often differ by an order(s) of magnitude or more. We took a two-step approach  
814 to bin the polymorphisms by age, accounting for this uncertainty. First, we determined the  
815 boundaries of age bins by sorting all SNPs segregating in CEU into 15 bins of roughly equal sizes  
816 with a Monte Carlo method (i.e., randomly selecting a point estimate by sampling a point uniformly  
817 between the upper and lower bounds of inferred allele age by Relate). We then calculated the  
818 *pseudo-counts* of each mutation type in each bin by summing up the probability densities across  
819 all variants, assuming a uniform distribution of each variant within the inferred age intervals. For  
820 example, if a T>A SNP has an estimated age range of (500, 1300) generations, which overlaps  
821 with three of the predetermined age bins (312, 545], (545, 1160], and (1160, 2970], we would  
822 assign the T>A SNP to three bins with the following weights  $(545-500)/(1300-500)=0.056$ ,  $(1160-$   
823  $545)/(1300-800)=0.769$ , and  $(1300-1160)/(1300-800)=0.175$ , respectively. We note that since the  
824 allele age distribution differs across populations due to differences in their demographic history,  
825 there is no way to bin variants equally for all populations simultaneously. For results shown in  
826 main figures, we based our binning into equal sizes on the age estimates of variants observed in

827 CEU. Results were qualitatively similar when the bin boundaries were determined based on  
828 variants observed in YRI and CHB samples (Figure 1—figure supplement 7; Figure 2—figure  
829 supplement 5).

830

### 831 **Calculating confidence intervals of polymorphism ratios and the statistical significance of** 832 **inter-population differences**

833 To assess the confidence intervals (CIs) of the mutation ratios in polymorphism data, we assumed  
834 the pseudo-counts of the two mutation types being compared follow a binomial distribution  
835 conditional on the total count. In practice, we used the normal approximation for calculating the  
836 95% CI of the proportion for a given mutation type based on the observed counts of two types,

837 using  $\hat{p} \pm z \sqrt{\frac{\hat{p}(1-\hat{p})}{n_1+n_2}}$ , where  $n_1$  and  $n_2$  are the pseudo-counts of two mutation types,  $\hat{p} = \frac{n_1}{n_1+n_2}$  is

838 the point estimate of the probability of success, and  $z=1.96$  is the Z-score corresponding to the  
839 upper 2.5%-tile. We then transformed the CI of fraction of one mutation type into that of the ratio

840 of the two mutation types using  $(\alpha_{lower}, \alpha_{upper}) = (\frac{p_{lower}}{1-p_{lower}}, \frac{p_{upper}}{1-p_{upper}})$ .

841

842 We performed chi-square tests to evaluate the statistical significance of inter-population  
843 differences in observed mutation ratios. Specifically, for each mutation ratio in each age bin, we  
844 constructed a  $2 \times N_{pop}$  contingency table, where each entry is the pseudo-count of observed  
845 polymorphisms of one of the two mutation types in a population. We then calculated the  $p$ -value  
846 of the  $\chi^2$  statistic and corrected for multiple hypothesis testing by Bonferroni correction by  
847 multiplying the  $p$ -value by  $15 \times 4$ , which represents the product of the number of age bins and the  
848 number of mutation ratios studied (for Figure 2—figure supplement 4, we substituted the first  
849 number by the number of derived allele frequency bins).

850

### 851 **Sequence contexts related to COSMIC mutational signatures SBS7 and SBS11**

852 We downloaded loadings of the single base substitution (SBS) reference signatures on the 96  
853 trinucleotide mutation types from COSMIC website (v3.2, GRCh38; link provided under  
854 *Resources*). We found that both SBS7a/b and SBS11 consist of nearly exclusive C>T mutations,  
855 with 86.7% mutations caused by SBS7a/b concentrated in YCN contexts while 70.0% SBS11  
856 mutations are in NCY contexts, where Y represents pyrimidine (i.e., C or T) and N represents any  
857 base. Therefore, as proxies for mutations potentially affected by SBS7a/b and SBS11, we  
858 removed C>T mutations in YCN and NCY contexts in analysis corresponding to Figure 2B.

859

### 860 **Quantification of parental age effects on DNM counts and ratios**

861 We used a model-based approach to quantify the effects of paternal and maternal ages jointly by  
862 leveraging information from all phased and unphased DNMs. In short, as described in (Gao et al.  
863 2019), we modeled the expected number of DNMs inherited from a parent as a linear function of  
864 parental age at conception, and assumed that the observed number of DNMs follows a Poisson  
865 distribution. Using a maximum likelihood approach, we estimated the sex-specific slopes and  
866 intercepts (at age zero) for each mutation ratio. Confidence intervals of the slopes and intercepts  
867 were assessed by bootstrap resampling of trios. With these estimated parental age effects, we  
868 then predicted the expected count of each mutation type and the pairwise ratios under given  
869 combinations of maternal and paternal ages, such as shown in the left panel of Figure 3.



870  
871 For analysis corresponding to Figures 3 and 4, we inferred the parental age effects based on a  
872 DNM dataset from 2,976 Icelandic trios (Halldorsson et al. 2019). Five trios have exceedingly  
873 large numbers of DNMs given the parental ages (Proband IDs: 24496, 71657, 8008, 64783,  
874 126025) and were removed in our analysis. Given the evidence for a non-linear effect of maternal  
875 age (i.e., a more rapid increase in maternal mutations at older ages) (Gao et al. 2019), we further  
876 excluded 92 trios with maternal ages above 40 in our analysis. Overall, DNM data from 2,879 trios  
877 were used for inference of (linear) parental age effects on DNMs. We also replicated the analysis  
878 (Figure 3—figure supplement 1; Figure 4—figure supplement 2) with an earlier dataset of DNMs  
879 from 1,548 Icelandic trios, excluding 73 trios with maternal ages above 40 (Jónsson et al. 2017).

880  
881 **Inference of generation time corresponding to the observed polymorphism ratios**  
882 Under the scenario of co-varying paternal and maternal reproductive ages, we inferred the  
883 generation time by solving the system of linear equations:  
884  $\frac{G_p}{G_m} = \gamma$ , where  $\gamma=0.8, 1, 1.1,$  or  $1.2$  is the assumed ratio of paternal to maternal ages;  
885 and  
886  $\frac{(\beta_p^1 G_p + \alpha_p^1) + (\beta_m^1 G_m + \alpha_m^1)}{(\beta_p^2 G_p + \alpha_p^2) + (\beta_m^2 G_m + \alpha_m^2)} = R_{1,2}$ , where  $\beta$  and  $\alpha$  are the slopes and intercepts estimated from DNM  
887 data for maternal ( $m$ ) or paternal age ( $p$ ) effects and  $R$  is the observed ratio of pseudo-counts of  
888 two mutation types (indicated with superscript 1,2) in an age bin.

889  
890 To evaluate the uncertainty in the generation time estimates, we solved the equation system  
891 with maximum likelihood estimates from each bootstrap replicate of pedigree data and obtained  
892 90% CIs of the inferred generation times from the overall distribution of estimates across all  
893 replicates.

894  
895 Under the scenario of independently varying paternal and maternal reproductive ages, the  
896 combinations of  $(G_p, G_m)$  that satisfy  $\frac{(\beta_p^1 G_p + \alpha_p^1) + (\beta_m^1 G_m + \alpha_m^1)}{(\beta_p^2 G_p + \alpha_p^2) + (\beta_m^2 G_m + \alpha_m^2)} = R_{1,2}$  follow a simple linear  
897 constraint, when other parameters are set. Therefore, we plotted in a two-dimensional plot the  
898 linear combinations of  $(G_p, G_m)$  corresponding to each observed polymorphism ratio and the  
899 slope and intercept estimates from all bootstrap replicates and compared the distribution of  
900 linear constraints across mutation ratios (Figure 4—figure supplement 2).

## 901 **Acknowledgements**

902 We thank Guy Amster, Monty Slatkin, David Reich, Nick Patterson, Christopher Adams and Iain  
903 Mathieson for helpful discussions. We thank Monty Slatkin, Ben Voight, Laurits Skov and Giulio  
904 Genovese for their comments on the manuscript.

## 905 **Funding**

906 ZG was supported by a Sloan Research Fellowship. PM was supported by a Sloan Research  
907 Fellowship, the Koret-UC Berkeley-Tel Aviv University Initiative in Computational Biology and  
908 Bioinformatics and NIH R35GM142978. MP was supported by NIH grant GM122975.

909

## 910 **Competing interests**

911

912 The authors declare that no competing interests exist.

913

## 914 **Additional files**

915

### 916 **Figure 1—figure supplements.**

#### 917 **Figure supplement 1. Mutation spectra of human polymorphisms stratified by allele age.**

918 The ancestral allele of each SNP is determined based on the human ancestral allele, and the  
919 allele age inferred by using Relate (Speidel et al. 2019). Populations are coded the same way  
920 as in the 1000 Genomes project (same below): YRI-Yoruba in Ibadan, Nigeria; LWK-Luhya in  
921 Webuye, Kenya; CEU-Utah Residents (CEPH) with Northern and Western European ancestry;  
922 TSI-Toscani in Italia; CHB-Han Chinese in Beijing, China; and JPT: Japanese in Tokyo, Japan.

923

#### 924 **Figure supplement 2. Mutation spectrum of SNPs found in CEU in comparison to that of**

925 ***de novo* mutations identified in trios from Iceland.** “DNM 2019” denotes DNM data from 2,879  
926 Icelandic trios (Halldorsson et al. 2019), from which five trios with exceedingly large numbers of  
927 DNMs and 92 trios with maternal age above 40 were excluded. “DNM 2017” denotes DNM data  
928 from 1,475 Icelandic trios from (Jónsson et al. 2017), excluding 73 trios with maternal age above  
929 40. All polymorphisms and DNMs were filtered to the commonly accessible region.

930

#### 931 **Figure supplement 3. Mutation spectra of CEU polymorphisms and DNMs from Icelandic**

932 **trios, excluding C>T transitions at CpG sites.**

933

934 **Figure supplement 4. Mean and distribution of B-scores of different mutation types.** We  
935 show the mean and the distribution of B-scores (measures the reduction in nucleotide diversity  
936 levels compared to neutral expectation (McVicker et al. 2009) (0-high constraint; 1000-low  
937 constraint) for different mutation types.

938

939 **Figure supplement 5. Mutation spectra of human polymorphisms in genomic regions with**  
940 **weak background selection (B-score>800).** The box represents the interquartile range, with  
941 the centerline showing the median value.

942

943 **Figure supplement 6. Fractions of S>S, S>W, W>S, and W>W mutations in variants**  
944 **stratified by derived frequency (A) and allele age (B).** The enrichment of weak (W)> strong (S)  
945 mutations and depletion of S>W mutations in variants with higher derived allele frequencies and  
946 old allele ages support profound effects of GC-biased gene conversion (gBGC) on human  
947 polymorphisms and biases in allele age dating by Relate, which ignores gBGC.

948

949 **Figure supplement 7. Mutation spectra of human polymorphisms stratified by allele age**  
950 **based on alternative binning strategies.** The age bin boundaries were determined based on  
951 allele age distribution of variants observed in YRI (A) and CHB (B) samples, respectively.

952

953 **Figure 2—figure supplements.**

954 **Figure supplement 1. Pairwise polymorphism ratios in three additional populations of**  
955 **African (LWK), European (TSI), and East Asian (JPT) ancestry in the 1000 Genomes project.**

956 The three signals of differences between YRI, CEU and CHB, are observed in LWK, TSI and JPT,  
957 with slight differences in the timing and magnitude of differences. Additionally, TSI shows a slightly  
958 elevated T>C/T>G ratio in recent time windows, which is absent in CEU and possibly represents  
959 another signal.

960

961 **Figure supplement 2. Pairwise polymorphism ratios in genomic regions with weak**  
962 **background selection (B-score >800).**

963

964 **Figure supplement 3. Pairwise polymorphism ratios in 33% of the genome with the lowest**  
965 **(A) and highest (B) regional recombination rates.**

966

967 **Figure supplement 4. Pairwise ratios of human polymorphisms stratified by allele**  
968 **frequency.** Unlike Figure 2 and its figure supplements, this analysis was performed on all non-

969 singleton variants, including unphased SNPs and those undated by Relate. Singletons were  
970 removed because they showed very different mutation ratios compared to all other variants,  
971 indicating higher false positive rates. We note that the derived allele frequency is a poor proxy for  
972 allele age, and variants at the same (sample) frequency can have drastically different ages within  
973 and across populations, which renders the inter-population comparisons difficult to interpret.  
974 However, for recent changes in the mutation spectrum, we expect the mutation ratios of low-  
975 frequency variants to differ across populations, as those variants are likely to be young.  
976 Consistent with this expectation, the two post-OOA signals in nonCpG C>T/C>A and C>G/T>A  
977 ratios are replicated in variants at low and intermediate frequencies. The signal of T>C/T>G in  
978 ancient variants is discernible in low-frequency variants (DAF<5%) but weak in high frequency  
979 variants, possibly because most of those ancient variants are segregating at low frequencies.

980

981 **Figure supplement 5. Pairwise polymorphism ratios in YRI, CEU, and CHB in commonly**  
982 **accessible regions based on alternative binning strategies.** The age bin boundaries were  
983 determined based on allele age distribution of variants observed in YRI (A) and CHB (B) samples,  
984 respectively.

985

986 **Figure supplement 6. Alternative pairwise polymorphism ratios (T>G/T>A and C>G/C>A)**  
987 **to investigate the cause of inter-population differences in C>G/T>A ratio.**

988

989 **Figure supplement 7.** Replication of the T>C/T>G signal with alternative derived allele  
990 polarization and region stratification by ancestry of reference genome. (A) The ancestral alleles  
991 polarized to the chimpanzee reference allele. (B) Genomic regions are stratified based on  
992 ancestry of human reference genome (African or European). Results are not shown for the small  
993 fraction of reference genome of Asian ancestry. The T>C/T>G is no longer significant in the two  
994 subsets of the genome due to reduction in sample size, but YRI still shows a higher ratio than  
995 CEU and CHB in both subsets with similar magnitude of elevation.

996

997 **Figure supplement 8. T>C/T>G ratio in YRI, CEU and CHB excluding variants for which the**  
998 **derived alleles are found in Denisovans (A), Neanderthals (B), and both (C).** The absence of  
999 significant signals in non-ND11 variants (C) is not purely due to a reduction in sample size, as the  
1000 set of ND11 variants is much smaller but shows highly significant differences between YRI and  
1001 the other two populations (Figure 2D).

1002  
1003 **Figure supplement 9. Alternative pairwise polymorphism ratios (T>C/T>A and T>A/T>G) to**  
1004 **investigate the cause of inter-population differences in T>C/T>G ratio.** The significant  
1005 differences in recent time windows (<3000 generations) in T>C/T>A and T>A/T>G comparison  
1006 are driven by differences in T>A mutation rate (CHB >CEU>YRI), which is consistent with findings  
1007 in Figure 2—figure supplement 6.

1008  
1009 **Figure supplement 10. Pairwise polymorphism ratios in YRI, CEU, and CHB in commonly**  
1010 **accessible regions excluding variants shared with Neanderthals and/or Denisovans.**

1011  
1012  
1013  
1014 **Figure 3—figure supplements.**

1015 **Figure supplement 1. Effects of parental ages on three pairwise mutation ratios estimated**  
1016 **from an earlier DNM dataset ((Jónsson et al. 2017)).** Shown on the right are the observed ratios  
1017 of polymorphisms in CEU stratified by allele age. All results are based on variants in the commonly  
1018 accessible regions, excluding those with derived alleles observed in either Neanderthal or  
1019 Denisovan or both.

1020  
1021 **Figure supplement 2. Discrepancies in the mutation spectrum between DNM datasets and**  
1022 **between DNMs and young polymorphisms.** Panel (A) shows the fractions of seven mutation  
1023 types in two DNM datasets (Halldorsson et al. 2019; (Jónsson et al. 2017)) as well as in CEU  
1024 SNPs in the three most recent time windows. Young polymorphisms are depleted of C>T  
1025 transitions at CpG sites compared to DNMs, consistent with the expectation that recurrent  
1026 mutations are undated and ignored by Relate. As we previously noted (Gao et al. 2019), the  
1027 fraction of C>A mutation in 2017 DNM dataset is substantially lower than that in polymorphisms,  
1028 which indicates under-detection and is somewhat ameliorated in the 2019 DNM dataset. Panel  
1029 (B) shows that, in addition to differences in C>T/C>A ratios at both CpG and nonCpG sites, the  
1030 two DNM datasets also differ significantly in the T>C/T>G ratio, suggesting additional technical  
1031 differences in mutation identification (note that the 2017 dataset is a subset of the 2019 dataset).  
1032 Furthermore, the C>G/T>A ratios of both DNM datasets are significantly higher than that in young  
1033 polymorphisms, highlighting technical differences between variant detection in DNM study and  
1034 population dataset. (TBD add goldmann dataset?)

1035  
1036 **Figure supplement 3. Sex-specific parental age effects on three pairwise mutation ratios.**  
1037 In the upper panel, the background color represents the expected DNM ratio given the paternal  
1038 (x-axis) and maternal (y-axis) age, with darker colors representing greater values. Each colored  
1039 line represents the linear combinations of paternal and maternal ages corresponding to a certain  
1040 mutation ratio observed in polymorphisms in an age bin. The vertical patterns for nonCpG

1041 C>T/C>A and T>C/T>G ratios suggest that these two ratios are insensitive to the maternal age.  
1042 The lower panel shows the observed polymorphism ratios ordered by allele age (same data as in  
1043 Figure 2—figure supplement 10), with the colors matching those of lines in the upper panel.

1044

1045 **Figure 4—figure supplements.**

1046 **Figure supplement 1. Past generation times corresponding to the observed pairwise**  
1047 **polymorphism ratios, assuming fixed ratio of male to female generation times of 0.8 (A),**  
1048 **1.1 (B) and 1.2 (C).** The parental age effects were inferred from DNM data of 2,879 Icelandic trios  
1049 from (Halldorsson et al. 2019).

1050

1051 **Figure supplement 2. Past generation times corresponding to the observed pairwise**  
1052 **polymorphism ratios, based on parental age effects estimated from an earlier DNM data**  
1053 **((Jónsson et al. 2017)).** In each panel, the ratio of male to female generation times is assumed to  
1054 be fixed throughout time at 0.8 (A), 1 (B) and 1.2 (C), respectively.

1055

1056 **Figure supplement 3. Combinations of paternal and maternal reproductive ages**  
1057 **corresponding to the observed pairwise polymorphism ratios.** Under the assumption of  
1058 linear parental age effects on the mutation rate of each mutation type, a specific value of pairwise  
1059 polymorphism ratio places a linear constraint on the values of paternal and maternal reproductive  
1060 ages (denoted by  $G_p$  and  $G_m$ ), which is represented by a line in each plot. Blue lines represent  
1061 predicted constraints based on the maximum likelihood estimators of mutation parameters  
1062 estimated from DNM data ((Halldorsson et al. 2019)); gray lines show constraints from 500  
1063 bootstrap replicates by resampling trios with replacement. Panels (A) and (B) show the same  
1064 results but with  $G_m$  and  $G_p$  shown on the x- and y-axes respectively, in order to illustrate their  
1065 temporal trends. Consistent with results shown in Figure 3—figure supplement 3, the T>C/T>G  
1066 and nonCpG C>T/C>A ratios are relatively insensitive to  $G_m$  and largely determined by  $G_p$ , so  
1067 the temporal trends of these two mutation ratios in panel (B) mirror those of Figure 4. The  
1068 C>G/T>A depends on both  $G_p$  and  $G_m$ , so its temporal trend in both panels (A) and (B) mirrors  
1069 that shown in Figure 4. Note that for each time window, the gray areas predicted by three  
1070 polymorphism ratios barely, if at all, overlap, suggesting that no combination of ( $G_p$ ,  $G_m$ ) values  
1071 can explain the three observed polymorphism ratios simultaneously. In addition, the temporal  
1072 trends predicted by the three polymorphism ratios disagree with each other.

1073

1074

1075 **Supplementary files**

1076 The source data can be downloaded from:

1077 [https://www.dropbox.com/s/5521h1sm5tplp0i/MutSpecGentime2022\\_SourceData.zip?dl=0](https://www.dropbox.com/s/5521h1sm5tplp0i/MutSpecGentime2022_SourceData.zip?dl=0)

1078

1079 **Source data 1.** Relate output for SNPs in commonly accessible region with additional  
1080 annotation (one file for each population of YRI, LWK, CEU, TSI, CHB, JPT);

1081 **Source data 2.** Text file with (pseudo-)counts of different types of mutations in YRI, LWK, CEU,  
1082 TSI, CHB, JPT in each time window.;

1083 **Source data 3:** Mutation parameters inferred from DNM data in 2,879 Icelandic trios with  
1084 estimated uncertainty based on bootstrap resampling (one file for each mutation type for  
1085 commonly accessible regions excluding archaic sites;  $n=500$  replicates).

1086 **Source data 4:** Past generation times inferred from each polymorphism ratio, assuming fixed  
1087 ratios of male to female generation times ( $Gp/Gm=0.8, 1, 1.2$ ), with confidence intervals  
1088 estimated using bootstrap resampling ( $n=500$  replicates; one file for each mutation type).

1089

1090

1091

## 1092 **References**

- 1093 1000 Genomes Project Consortium, Adam Auton, Lisa D. Brooks, Richard M. Durbin, Erik P.  
1094 Garrison, Hyun Min Kang, Jan O. Korb, et al. 2015. "A Global Reference for Human  
1095 Genetic Variation." *Nature* 526 (7571): 68–74.
- 1096 Aggarwala, Varun, and Benjamin F. Voight. 2016. "An Expanded Sequence Context Model  
1097 Broadly Explains Variability in Polymorphism Levels across the Human Genome." *Nature*  
1098 *Genetics* 48 (4): 349–55.
- 1099 Aikens, Rachael C., Kelsey E. Johnson, and Benjamin F. Voight. 2019. "Signals of Variation in  
1100 Human Mutation Rate at Multiple Levels of Sequence Context." *Molecular Biology and*  
1101 *Evolution* 36 (5): 955–65.
- 1102 Alexandrov, Ludmil B., Jaegil Kim, Nicholas J. Haradhvala, Mi Ni Huang, Alvin Wei Tian Ng,  
1103 Yang Wu, Arnoud Boot, et al. 2020. "The Repertoire of Mutational Signatures in Human  
1104 Cancer." *Nature* 578 (7793): 94–101.
- 1105 Anderson-Trocme, Luke, Rick Farouni, Mathieu Bourgey, Yoichiro Kamatani, Koichiro Higasa,  
1106 Jeong-Sun Seo, Changhoon Kim, Fumihiko Matsuda, and Simon Gravel. 2020. "Legacy  
1107 Data Confound Genomics Studies." *Molecular Biology and Evolution* 37 (1): 2–10.
- 1108 Bergeron, Lucie A., Søren Besenbacher, Tychele N. Turner, Cyril J. Versoza, Richard J. Wang,  
1109 Alivia Lee Price, Ellie Armstrong, et al. 2021. "Mutationathon: Towards Standardization in  
1110 Estimates of Pedigree-Based Germline Mutation Rates." *bioRxiv*.  
1111 <https://doi.org/10.1101/2021.08.30.458162>.
- 1112 Byrska-Bishop, Marta, Uday S. Evani, Xuefang Zhao, Anna O. Basile, Haley J. Abel, Allison A.  
1113 Regier, André Corvelo, et al. 2021. "High Coverage Whole Genome Sequencing of the  
1114 Expanded 1000 Genomes Project Cohort Including 602 Trios."  
1115 <https://doi.org/10.1101/2021.02.06.430068>.
- 1116 Carlson, Jedidiah, Adam E. Locke, Matthew Flickinger, Matthew Zawistowski, Shawn Levy,  
1117 Richard M. Myers, Michael Boehnke, et al. 2018. "Extremely Rare Variants Reveal Patterns  
1118 of Germline Mutation Rate Heterogeneity in Humans." *Nature Communications* 9 (1): 3753.
- 1119 Charlesworth, B., M. T. Morgan, and D. Charlesworth. 1993. "The Effect of Deleterious  
1120 Mutations on Neutral Molecular Variation." *Genetics* 134 (4): 1289–1303.
- 1121 Chen, Lu, Aaron B. Wolf, Wenqing Fu, Liming Li, and Joshua M. Akey. 2020. "Identifying and  
1122 Interpreting Apparent Neanderthal Ancestry in African Individuals." *Cell* 180 (4): 677–  
1123 87.e16.
- 1124 Danecek, Petr, Adam Auton, Goncalo Abecasis, Cornelis A. Albers, Eric Banks, Mark A.  
1125 DePristo, Robert E. Handsaker, et al. 2011. "The Variant Call Format and VCFtools."  
1126 *Bioinformatics* 27 (15): 2156–58.
- 1127 DeWitt, William S., Kameron Decker Harris, Aaron P. Ragsdale, and Kelley Harris. 2021.  
1128 "Nonparametric Coalescent Inference of Mutation Spectrum History and Demography."  
1129 *Proceedings of the National Academy of Sciences of the United States of America* 118  
1130 (21). <https://doi.org/10.1073/pnas.2013798118>.

- 1131 Duncan, B. K., and J. H. Miller. 1980. "Mutagenic Deamination of Cytosine Residues in DNA."  
1132 *Nature* 287 (5782): 560–61.
- 1133 Duret, Laurent, and Nicolas Galtier. 2009. "Biased Gene Conversion and the Evolution of  
1134 Mammalian Genomic Landscapes." *Annual Review of Genomics and Human Genetics* 10:  
1135 285–311.
- 1136 Durvasula, Arun, and Sriram Sankararaman. 2020. "Recovering Signals of Ghost Archaic  
1137 Introgression in African Populations." *Science Advances* 6 (7): eaax5097.
- 1138 Fenner, Jack N. 2005. "Cross-Cultural Estimation of the Human Generation Interval for Use in  
1139 Genetics-Based Population Divergence Studies." *American Journal of Physical  
1140 Anthropology* 128 (2): 415–23.
- 1141 Gao, Ziyue, Priya Moorjani, Thomas A. Sasani, Brent S. Pedersen, Aaron R. Quinlan, Lynn B.  
1142 Jorde, Guy Amster, and Molly Przeworski. 2019. "Overlooked Roles of DNA Damage and  
1143 Maternal Age in Generating Human Germline Mutations." *Proceedings of the National  
1144 Academy of Sciences of the United States of America* 116 (19): 9491–9500.
- 1145 Goldberg, Michael E., and Kelley Harris. 2022. "Mutational Signatures of Replication Timing and  
1146 Epigenetic Modification Persist through the Global Divergence of Mutation Spectra across  
1147 the Great Ape Phylogeny." *Genome Biology and Evolution* 14 (1).  
1148 <https://doi.org/10.1093/gbe/evab104>.
- 1149 Goldmann, Jakob M., Vladimir B. Seplyarskiy, Wendy S. W. Wong, Thierry Vilboux, Pieter B.  
1150 Neerincx, Dale L. Bodian, Benjamin D. Solomon, et al. 2018. "Germline de Novo Mutation  
1151 Clusters Arise during Oocyte Aging in Genomic Regions with High Double-Strand-Break  
1152 Incidence." *Nature Genetics* 50 (4): 487–92.
- 1153 Goldmann, Jakob M., Wendy S. W. Wong, Michele Pinelli, Terry Farrah, Dale Bodian, Anna B.  
1154 Stittrich, Gustavo Glusman, et al. 2016. "Parent-of-Origin-Specific Signatures of de Novo  
1155 Mutations." *Nature Genetics* 48 (8): 935–39.
- 1156 Green, Richard E., Johannes Krause, Adrian W. Briggs, Tomislav Maricic, Udo Stenzel, Martin  
1157 Kircher, Nick Patterson, et al. 2010. "A Draft Sequence of the Neandertal Genome."  
1158 *Science* 328 (5979): 710–22.
- 1159 Halldorsson, Bjarni V., Gunnar Palsson, Olafur A. Stefansson, Hakon Jonsson, Marteinn T.  
1160 Hardarson, Hannes P. Eggertsson, Bjarni Gunnarsson, et al. 2019. "Characterizing  
1161 Mutagenic Effects of Recombination through a Sequence-Level Genetic Map." *Science*.  
1162 <https://doi.org/10.1126/science.aau1043>.
- 1163 Hammer, Michael F., August E. Woerner, Fernando L. Mendez, Joseph C. Watkins, and Jeffrey  
1164 D. Wall. 2011. "Genetic Evidence for Archaic Admixture in Africa." *Proceedings of the  
1165 National Academy of Sciences of the United States of America* 108 (37): 15123–28.
- 1166 Harpak, Arbel, Anand Bhaskar, and Jonathan K. Pritchard. 2016. "Mutation Rate Variation Is a  
1167 Primary Determinant of the Distribution of Allele Frequencies in Humans." *PLoS Genetics*  
1168 12 (12): e1006489.
- 1169 Harris, Kelley. 2015. "Evidence for Recent, Population-Specific Evolution of the Human Mutation  
1170 Rate." *Proceedings of the National Academy of Sciences of the United States of America*  
1171 112 (11): 3439–44.
- 1172 Harris, Kelley, and Jonathan K. Pritchard. 2017. "Rapid Evolution of the Human Mutation  
1173 Spectrum." *eLife* 6 (April). <https://doi.org/10.7554/eLife.24284>.
- 1174 Hwang, Dick G., and Phil Green. 2004. "Bayesian Markov Chain Monte Carlo Sequence  
1175 Analysis Reveals Varying Neutral Substitution Patterns in Mammalian Evolution."  
1176 *Proceedings of the National Academy of Sciences of the United States of America* 101  
1177 (39): 13994–1.
- 1178 Jiang, Pengyao, Anja R. Ollodart, Vidha Sudhesh, Alan J. Herr, Maitreya J. Dunham, and Kelley  
1179 Harris. 2021. "A Modified Fluctuation Assay Reveals a Natural Mutator Phenotype That  
1180 Drives Mutation Spectrum Variation within *Saccharomyces Cerevisiae*." *eLife* 10  
1181 (September). <https://doi.org/10.7554/eLife.68285>.

- 1182 Jónsson, Hákon, Patrick Sulem, Birte Kehr, Snaedis Kristmundsdottir, Florian Zink, Eiríkur  
1183 Hjartarson, Marteinn T. Hardarson, et al. 2017. “Parental Influence on Human Germline de  
1184 Novo Mutations in 1,548 Trios from Iceland.” *Nature* 549 (7673): 519–22.
- 1185 Kaplanis, Joanna, Benjamin Ide, Rashesh Sanghvi, Matthew Neville, Petr Danecek, Tim  
1186 Coorens, Elena Prigmore, et al. 2021. “Genetic and Chemotherapeutic Causes of Germline  
1187 Hypermutation.” *bioRxiv*, 2021–2006.
- 1188 Kimura, M. 1969. “The Number of Heterozygous Nucleotide Sites Maintained in a Finite  
1189 Population due to Steady Flux of Mutations.” *Genetics* 61 (4): 893–903.
- 1190 Kong, Augustine, Michael L. Frigge, Gisli Masson, Soren Besenbacher, Patrick Sulem, Gisli  
1191 Magnusson, Sigurjon A. Gudjonsson, et al. 2012. “Rate of de Novo Mutations and the  
1192 Importance of Father’s Age to Disease Risk.” *Nature*. <https://doi.org/10.1038/nature11396>.
- 1193 Lander, E. S., L. M. Linton, B. Birren, C. Nusbaum, M. C. Zody, J. Baldwin, K. Devon, et al.  
1194 2001. “Initial Sequencing and Analysis of the Human Genome.” *Nature* 409 (6822): 860–  
1195 921.
- 1196 Lek, Monkol, Konrad J. Karczewski, Eric V. Minikel, Kaitlin E. Samocha, Eric Banks, Timothy  
1197 Fennell, Anne H. O’Donnell-Luria, et al. 2016. “Analysis of Protein-Coding Genetic Variation  
1198 in 60,706 Humans.” *Nature* 536 (7616): 285–91.
- 1199 Macià, Moisès Coll, Laurits Skov, Benjamin Marco Peter, and Mikkel Heide Schierup. 2021.  
1200 “Different Historical Generation Intervals in Human Populations Inferred from Neanderthal  
1201 Fragment Lengths and Mutation Signatures.” *Nature Communications*.  
1202 <https://doi.org/10.1038/s41467-021-25524-4>.
- 1203 Mallick, Swapn, Heng Li, Mark Lipson, Iain Mathieson, Melissa Gymrek, Fernando Racimo,  
1204 Mengyao Zhao, et al. 2016. “The Simons Genome Diversity Project: 300 Genomes from  
1205 142 Diverse Populations.” *Nature* 538 (7624): 201–6.
- 1206 Mathieson, Iain, and Gil McVean. 2014. “Demography and the Age of Rare Variants.” *PLoS*  
1207 *Genetics* 10 (8): e1004528.
- 1208 Mathieson, Iain, and David Reich. 2017. “Differences in the Rare Variant Spectrum among  
1209 Human Populations.” *PLoS Genetics* 13 (2): e1006581.
- 1210 McVicker, Graham, David Gordon, Colleen Davis, and Phil Green. 2009. “Widespread Genomic  
1211 Signatures of Natural Selection in Hominid Evolution.” *PLoS Genetics* 5 (5): e1000471.
- 1212 Meyer, Matthias, Martin Kircher, Marie-Theres Gansauge, Heng Li, Fernando Racimo, Swapn  
1213 Mallick, Joshua G. Schraiber, et al. 2012. “A High-Coverage Genome Sequence from an  
1214 Archaic Denisovan Individual.” *Science* 338 (6104): 222–26.
- 1215 Milligan, William R., Guy Amster, and Guy Sella. 2021. “The Impact of Genetic Modifiers on  
1216 Variation in Germline Mutation Rates within and among Human Populations.” *bioRxiv*.  
1217 <https://doi.org/10.1101/2021.08.25.457718>.
- 1218 Monroe, J. Grey, Thanvi Srikant, Pablo Carbonell-Bejerano, Claude Becker, Mariele Lensink,  
1219 Moises Exposito-Alonso, Marie Klein, et al. 2022. “Mutation Bias Reflects Natural Selection  
1220 in Arabidopsis Thaliana.” *Nature* 602 (7895): 101–5.
- 1221 Moorjani, Priya, Carlos Eduardo G. Amorim, Peter F. Arndt, and Molly Przeworski. 2016.  
1222 “Variation in the Molecular Clock of Primates.” *Proceedings of the National Academy of*  
1223 *Sciences of the United States of America* 113 (38): 10607–12.
- 1224 Moorjani, Priya, Sriram Sankararaman, Qiaomei Fu, Molly Przeworski, Nick Patterson, and  
1225 David Reich. 2016. “A Genetic Method for Dating Ancient Genomes Provides a Direct  
1226 Estimate of Human Generation Interval in the Last 45,000 Years.” *Proceedings of the*  
1227 *National Academy of Sciences of the United States of America* 113 (20): 5652–57.
- 1228 Murphy, David, Eyal Elyashiv, Guy Amster, and Guy Sella. 2021. “Broad-Scale Variation in  
1229 Human Genetic Diversity Levels Is Predicted by Purifying Selection on Coding and Non-  
1230 Coding Elements.” <https://doi.org/10.1101/2021.07.02.450762>.
- 1231 Narasimhan, Vagheesh M., Raheleh Rahbari, Aylwyn Scally, Arthur Wuster, Dan Mason, Yali  
1232 Xue, John Wright, et al. 2017. “Estimating the Human Mutation Rate from Autozygous



- 1233 Segments Reveals Population Differences in Human Mutational Processes.” *Nature*  
1234 *Communications* 8 (1): 303.
- 1235 Prüfer, Kay, Fernando Racimo, Nick Patterson, Flora Jay, Sriram Sankararaman, Susanna  
1236 Sawyer, Anja Heinze, et al. 2014. “The Complete Genome Sequence of a Neanderthal from  
1237 the Altai Mountains.” *Nature* 505 (7481): 43–49.
- 1238 Ragsdale, Aaron P., and Simon Gravel. 2019. “Models of Archaic Admixture and Recent History  
1239 from Two-Locus Statistics.” *PLOS Genetics*. <https://doi.org/10.1371/journal.pgen.1008204>.
- 1240 Ragsdale, Aaron P., Timothy D. Weaver, Elizabeth G. Atkinson, Eileen Hoal, Marlo Möller,  
1241 Brenna M. Henn, and Simon Gravel. 2022. “A Weakly Structured Stem for Human Origins  
1242 in Africa.” *bioRxiv*. <https://doi.org/10.1101/2022.03.23.485528>.
- 1243 Sankararaman, Sriram, Swapan Mallick, Michael Dannemann, Kay Prüfer, Janet Kelso, Svante  
1244 Pääbo, Nick Patterson, and David Reich. 2014. “The Genomic Landscape of Neanderthal  
1245 Ancestry in Present-Day Humans.” *Nature* 507 (7492): 354–57.
- 1246 Sasani, Thomas A., David G. Ashbrook, Annabel C. Beichman, Lu Lu, Abraham A. Palmer,  
1247 Robert W. Williams, Jonathan K. Pritchard, and Kelley Harris. 2021. “A Natural Mutator  
1248 Allele Shapes Mutation Spectrum Variation in Mice.” *bioRxiv*. bioRxiv.  
1249 <https://doi.org/10.1101/2021.03.12.435196>.
- 1250 Schiffels, Stephan, and Richard Durbin. 2014. “Inferring Human Population Size and Separation  
1251 History from Multiple Genome Sequences.” *Nature Genetics* 46 (8): 919–25.
- 1252 Seoighe, Cathal, and Aylwyn Scally. 2017. “Inference of Candidate Germline Mutator Loci in  
1253 Humans from Genome-Wide Haplotype Data.” *PLoS Genetics* 13 (1): e1006549.
- 1254 Seplyarskiy, Vladimir B., Ruslan A. Soldatov, Evan Koch, Ryan J. McGinty, Jakob M.  
1255 Goldmann, Ryan D. Hernandez, Kathleen Barnes, et al. 2021. “Population Sequencing  
1256 Data Reveal a Compendium of Mutational Processes in the Human Germ Line.” *Science*  
1257 373 (6558): 1030–35.
- 1258 Skov, Laurits, Moisés Coll Macià, Garðar Sveinbjörnsson, Fabrizio Mafessoni, Elise A. Lucotte,  
1259 Margret S. Einarsdóttir, Hakon Jonsson, et al. 2020. “The Nature of Neanderthal  
1260 Introgression Revealed by 27,566 Icelandic Genomes.” *Nature* 582 (7810): 78–83.
- 1261 Speidel, Leo, Marie Forest, Sinan Shi, and Simon R. Myers. 2019. “A Method for Genome-Wide  
1262 Genealogy Estimation for Thousands of Samples.” *Nature Genetics* 51 (9): 1321–29.
- 1263 Wakeley, John. 2010. “Natural Selection and Coalescent Theory.” *Evolution since Darwin: The*  
1264 *First 150*: 119–49.
- 1265 Wang, Richard J., Samer I. Al-Saffar, Jeffrey Rogers, and Matthew W. Hahn. 2021. “Human  
1266 Generation Times across the Past 250,000 Years.” *bioRxiv*.  
1267 <https://doi.org/10.1101/2021.09.07.459333>.
- 1268 Wu, C. I., and W. H. Li. 1985. “Evidence for Higher Rates of Nucleotide Substitution in Rodents  
1269 than in Man.” *Proceedings of the National Academy of Sciences of the United States of*  
1270 *America* 82 (6): 1741–45.

1271
